# Supplementary material for: Associations of Radiomic Data Extracted from Static and Respiratory-Gated CT Scans with Disease Recurrence in Lung Cancer Patients Treated with SBRT
Source: PubMed Central journal article supplement (PMC5207741; doi:10.1371/journal.pone.0169172), 2017-01-03
Supplement: pone.0169172.s001.pdf [file pone.0169172.s001.pdf]

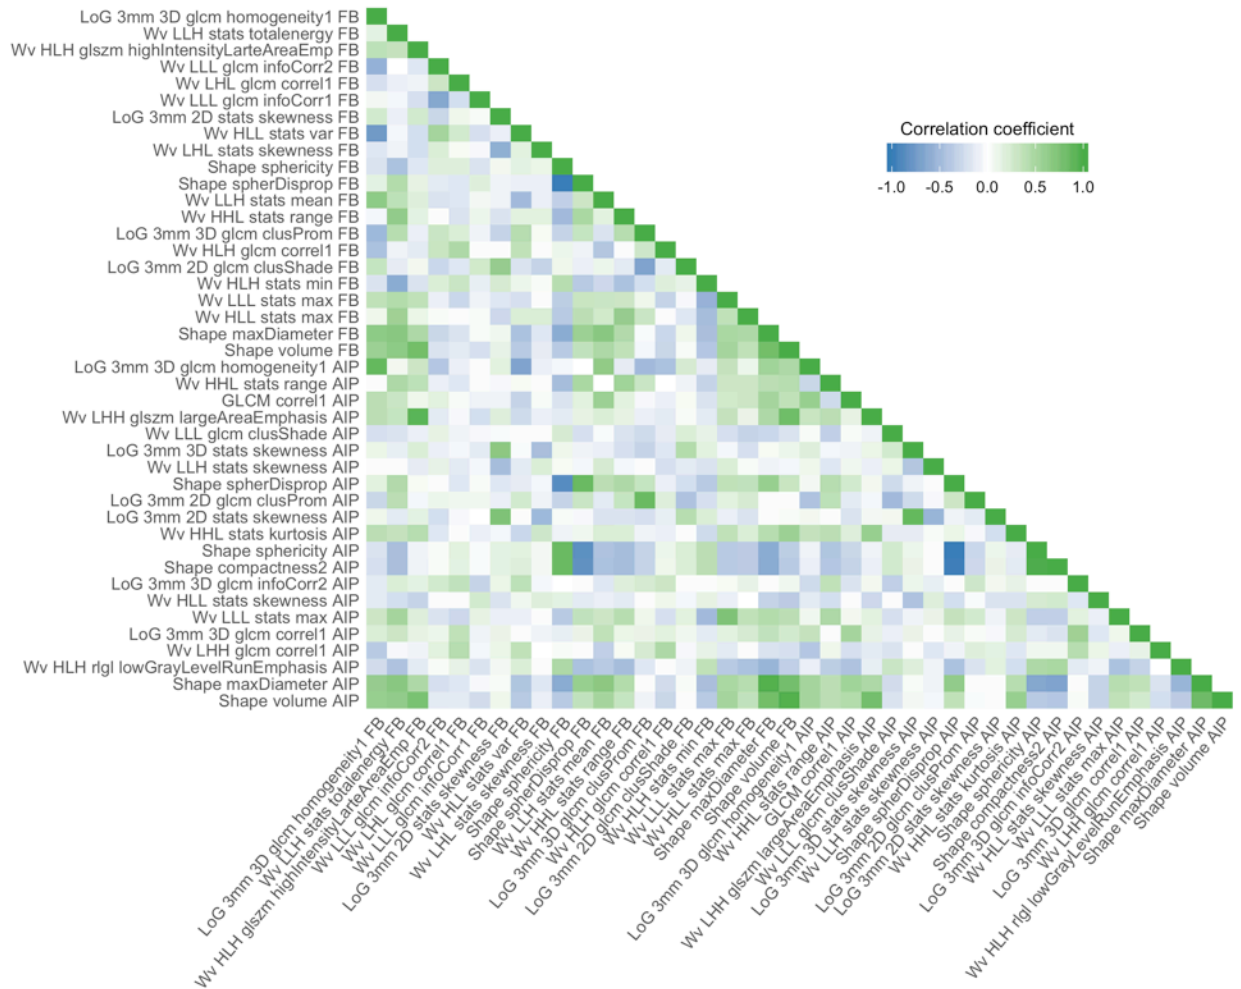

**S1 Fig.** Heatmap of the Spearman's correlation coefficient between FB and AIP imaging features. The imaging features included 2 conventional features and 19 radiomic features from FB and AIP images. Blue indicates a negative correlation, green indicates a positive correlation.
