# Supplementary material for: Associations of Radiomic Data Extracted from Static and Respiratory-Gated CT Scans with Disease Recurrence in Lung Cancer Patients Treated with SBRT
Source: PubMed Central journal article supplement (PMC5207741; doi:10.1371/journal.pone.0169172), 2017-01-03
Supplement: pone.0169172.s002.pdf [file pone.0169172.s002.pdf]

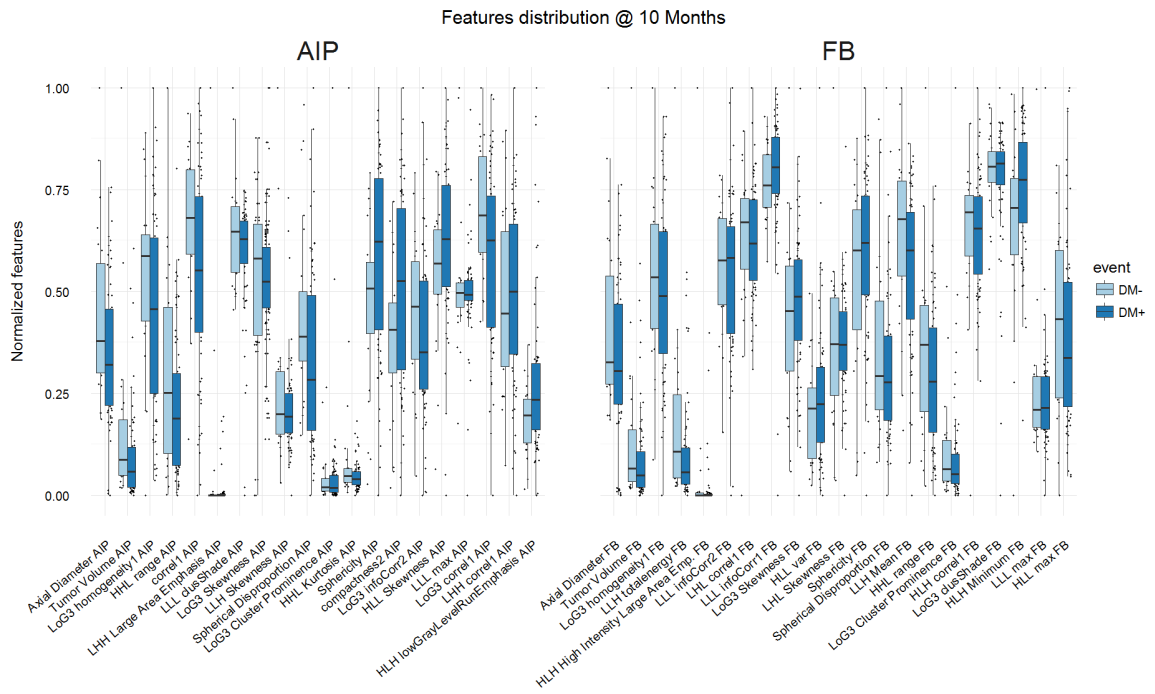

**S2 Fig.** Boxplots of the distribution of feature values for patients with and without a distant metastasis (DM) event, calculated at 10 months.
