# Supplementary material for: Associations of Radiomic Data Extracted from Static and Respiratory-Gated CT Scans with Disease Recurrence in Lung Cancer Patients Treated with SBRT
Source: PubMed Central journal article supplement (PMC5207741; doi:10.1371/journal.pone.0169172), 2017-01-03
Supplement: pone.0169172.s007.pdf [file pone.0169172.s007.pdf]

Data

Outcome data

| Patient | DM | Time to DM (months) | LRR | Time to LRR (months) |
|---------|----|---------------------|-----|----------------------|
| 1       | 0  |                     | 0   |                      |
| 2       | 0  |                     | 0   |                      |
| 3       | 0  |                     | 0   |                      |
| 4       | 0  |                     | 0   |                      |
| 5       | 1  | 3.501388889         | 0   |                      |
| 6       | 0  |                     | 0   |                      |
| 7       | 0  |                     | 0   |                      |
| 8       | 0  |                     | 0   |                      |
| 9       | 1  | 4.031944444         | 1   | 4.031944444          |
| 10      | 1  | 7.498611111         | 1   | 7.498611111          |
| 11      | 1  | 3.665277778         | 1   | 3.665277778          |
| 12      | 0  |                     | 0   |                      |
| 13      | 0  |                     | 0   |                      |
| 14      | 0  |                     | 0   |                      |
| 15      | 0  |                     | 0   |                      |
| 16      | 1  | 8.934722222         | 1   | 8.934722222          |
| 17      | 0  |                     | 0   |                      |
| 18      | 0  |                     | 0   |                      |
| 19      | 0  |                     | 0   |                      |
| 20      | 0  |                     | 0   |                      |
| 21      | 0  |                     | 0   |                      |
| 22      | 0  |                     | 0   |                      |
| 23      | 0  |                     | 0   |                      |
| 24      | 0  |                     | 0   |                      |
| 25      | 0  |                     | 1   | 26.36805556          |
| 26      | 0  |                     | 0   |                      |
| 27      | 0  |                     | 0   |                      |
| 28      | 0  |                     | 0   |                      |
| 29      | 0  |                     | 0   |                      |
| 30      | 1  | 37.66666667         | 0   |                      |
| 31      | 1  | 10.89861111         | 1   | 7.398611111          |
| 32      | 1  | 8.998611111         | 1   | 8.998611111          |
| 33      | 0  |                     | 0   |                      |
| 34      | 1  | 20.86527778         | 1   | 20.86527778          |
| 35      | 0  |                     | 0   |                      |
| 36      | 0  |                     | 0   |                      |
| 37      | 1  | 5.633333333         | 1   | 3.566666667          |

| Patient | DM | Time to DM (months) | LRR | Time to LRR (months) |
|---------|----|---------------------|-----|----------------------|
| 38      | 0  |                     | 0   |                      |
| 39      | 1  | 2                   | 1   | 2                    |
| 40      | 1  | 11.53333333         | 0   |                      |
| 41      | 0  |                     | 0   |                      |
| 42      | 0  |                     | 0   |                      |
| 43      | 0  |                     | 0   |                      |
| 44      | 0  |                     | 0   |                      |
| 45      | 0  |                     | 0   |                      |
| 46      | 0  |                     | 0   |                      |
| 47      | 1  | 24.76666667         | 0   |                      |
| 48      | 0  |                     | 0   |                      |
| 49      | 1  | 8.366666667         | 1   | 8.366666667          |
| 50      | 0  |                     | 0   |                      |
| 51      | 0  |                     | 0   |                      |
| 52      | 0  |                     | 0   |                      |
| 53      | 0  |                     | 0   |                      |
| 54      | 0  |                     | 1   | 12.9                 |
| 55      | 1  | 9.998611111         | 1   | 9.998611111          |
| 56      | 0  |                     | 0   |                      |
| 57      | 0  |                     | 0   |                      |
| 58      | 1  | 10.33333333         | 0   |                      |
| 59      | 1  | 13.93333333         | 1   | 6.8                  |
| 60      | 0  |                     | 0   |                      |
| 61      | 0  |                     | 0   |                      |
| 62      | 0  |                     | 0   |                      |
| 63      | 0  |                     | 0   |                      |
| 64      | 0  |                     | 0   |                      |
| Patient | DM | Time to DM (months) | LRR | Time to LRR (months) |
| 65      | 1  | 13.7                | 1   | 13.7                 |
| 66      | 0  |                     | 1   | 13.86666667          |
| 67      | 0  |                     | 0   |                      |
| 68      | 1  | 12.16666667         | 0   |                      |
| 69      | 0  |                     | 0   |                      |
| 70      | 0  |                     | 0   |                      |
| 71      | 0  |                     | 0   |                      |
| 72      | 0  |                     | 0   |                      |
| 73      | 0  |                     | 0   |                      |

|     |   |             |   |             |
|-----|---|-------------|---|-------------|
| 74  | 1 | 2.4         | 0 |             |
| 75  | 1 | 5.631944444 | 1 | 5.631944444 |
| 76  | 0 |             | 0 |             |
| 77  | 0 |             | 0 |             |
| 78  | 0 |             | 0 |             |
| 79  | 0 |             | 0 |             |
| 80  | 0 |             | 1 | 5.334722222 |
| 81  | 0 |             | 1 | 15.73472222 |
| 82  | 0 |             | 1 | 5.301388889 |
| 83  | 0 |             | 0 |             |
| 84  | 0 |             | 0 |             |
| 85  | 1 | 21.66666667 | 1 | 21.66666667 |
| 86  | 0 |             | 0 |             |
| 87  | 0 |             | 0 |             |
| 88  | 0 |             | 0 |             |
| 89  | 0 |             | 0 |             |
| 90  | 0 |             | 0 |             |
| 91  | 0 |             | 0 |             |
| 92  | 0 |             | 0 |             |
| 93  | 0 |             | 0 |             |
| 94  | 0 |             | 0 |             |
| 95  | 0 |             | 0 |             |
| 96  | 0 |             | 0 |             |
| 97  | 0 |             | 0 |             |
| 98  | 0 |             | 0 |             |
| 99  | 0 |             | 0 |             |
| 100 | 0 |             | 0 |             |
| 101 | 0 |             | 1 | 18.96805556 |
| 102 | 0 |             | 0 |             |
| 103 | 0 |             | 0 |             |
| 104 | 0 |             | 1 | 8.7         |
| 105 | 0 |             | 0 |             |
| 106 | 1 | 15.19861111 | 0 |             |
| 107 | 0 |             | 0 |             |
| 108 | 0 |             | 0 |             |
| 109 | 0 |             | 1 | 9.466666667 |
| 110 | 0 |             | 0 |             |
| 111 | 0 |             | 0 |             |
| 112 | 0 |             | 0 |             |



### Selected radiomic features

| Patient | LoG_sigma_3_mm_3D_glcm_homogeneity1_FB | Wavelet_LLH_stats_totalenergy_FB | Wavelet_HLH_glszm_highIntensityLarteraEmp_FB | Wavelet_LLL_glcm_infoCorr2_FB | Wavelet_LH_L_glcm_corr1_FB | Wavelet_LLL_glcm_infoCorr1_FB |
|---------|----------------------------------------|----------------------------------|----------------------------------------------|-------------------------------|----------------------------|-------------------------------|
| 1       | 0.34124                                | 2926769.638                      | 1917.92                                      | 0.98221                       | 0.58166                    | -0.51775                      |
| 2       | 0.52854                                | 13893824.88                      | 2803556.692                                  | 0.88721                       | 0.49898                    | -0.24364                      |
| 3       | 0.49226                                | 6436958.533                      | 8844.2941                                    | 0.89333                       | 0.51187                    | -0.2504                       |
| 4       | 0.67229                                | 93293610.63                      | 5222295540                                   | 0.80495                       | 0.38093                    | -0.2901                       |
| 5       | 0.62115                                | 57948826.33                      | 1942.725                                     | 0.85574                       | 0.43788                    | -0.28652                      |
| 6       | 0.61058                                | 32360830.56                      | 231196070.7                                  | 0.84222                       | 0.52759                    | -0.25072                      |
| 7       | 0.56634                                | 5522652.116                      | 2495001.903                                  | 0.79996                       | 0.47614                    | -0.20381                      |
| 8       | 0.48401                                | 22364476.05                      | 44241.3478                                   | 0.86334                       | 0.50128                    | -0.23058                      |
| 9       | 0.73673                                | 69171403.57                      | 13107134631                                  | 0.79324                       | 0.47985                    | -0.32202                      |
| 10      | 0.64118                                | 50070953.23                      | 797182047.3                                  | 0.83125                       | 0.27829                    | -0.26941                      |
| 11      | 0.52598                                | 22449552.5                       | 8170157.861                                  | 0.87871                       | 0.50658                    | -0.24741                      |
| 12      | 0.50667                                | 8300960.242                      | 282500.0286                                  | 0.89069                       | 0.44777                    | -0.24905                      |
| 13      | 0.64284                                | 18253198.89                      | 59789407.81                                  | 0.82953                       | 0.48658                    | -0.25034                      |
| 14      | 0.53332                                | 39835678.14                      | 68817698.48                                  | 0.90611                       | 0.54284                    | -0.26587                      |
| 15      | 0.53585                                | 16800941.29                      | 12723699.41                                  | 0.82219                       | 0.462                      | -0.20954                      |
| 16      | 0.48334                                | 16043986.95                      | 1645506                                      | 0.90613                       | 0.52313                    | -0.26292                      |
| 17      | 0.49335                                | 18244952.24                      | 16440.1944                                   | 0.87628                       | 0.45763                    | -0.23189                      |
| 18      | 0.43743                                | 76758432.45                      | 4565944.825                                  | 0.88862                       | 0.4987                     | -0.24216                      |
| 19      | 0.66635                                | 7131807.356                      | 55413951.38                                  | 0.79502                       | 0.44381                    | -0.23015                      |
| 20      | 0.55172                                | 5172306.777                      | 2430746.69                                   | 0.85269                       | 0.50293                    | -0.24107                      |
| 21      | 0.62518                                | 7736437.339                      | 31741437.96                                  | 0.86951                       | 0.42568                    | -0.26694                      |
| 22      | 0.54583                                | 12592918.92                      | 41081272.24                                  | 0.82388                       | 0.49016                    | -0.21171                      |
| 23      | 0.64766                                | 33009933.33                      | 5119.0588                                    | 0.80741                       | 0.46971                    | -0.25286                      |
| 24      | 0.53552                                | 16226615.6                       | 4443523.973                                  | 0.87803                       | 0.51933                    | -0.24529                      |
| 25      | 0.58822                                | 36432399.88                      | 1434.0789                                    | 0.87402                       | 0.47741                    | -0.25713                      |
| 26      | 0.5582                                 | 8895032.86                       | 13314648.25                                  | 0.87144                       | 0.4632                     | -0.24426                      |
| 27      | 0.46481                                | 78113137.16                      | 18385555.86                                  | 0.91032                       | 0.42263                    | -0.25567                      |
| 28      | 0.54108                                | 15460714.43                      | 4118.3095                                    | 0.85833                       | 0.53407                    | -0.23848                      |
| 29      | 0.69214                                | 78355701.59                      | 4013208563                                   | 0.87601                       | 0.54321                    | -0.32427                      |
| 30      | 0.57514                                | 44813374.2                       | 65613333.73                                  | 0.85111                       | 0.49105                    | -0.23881                      |
| 31      | 0.60669                                | 7460642.207                      | 5383042.214                                  | 0.82961                       | 0.50185                    | -0.25801                      |
| 32      | 0.51632                                | 5597436.733                      | 433822.0303                                  | 0.91809                       | 0.44563                    | -0.28632                      |
| 33      | 0.66212                                | 27026879.55                      | 314089400                                    | 0.79078                       | 0.54865                    | -0.25217                      |
| 34      | 0.44397                                | 9800832.655                      | 10200.8857                                   | 0.8953                        | 0.57511                    | -0.25864                      |
| 35      | 0.53159                                | 11958429.15                      | 7561574                                      | 0.85723                       | 0.49808                    | -0.23796                      |
| 36      | 0.67572                                | 7078126.861                      | 24381173                                     | 0.80368                       | 0.48012                    | -0.24766                      |
| 37      | 0.56866                                | 30500452.67                      | 145015.8857                                  | 0.80978                       | 0.50907                    | -0.23163                      |

|    |         |             |             |         |         |          |
|----|---------|-------------|-------------|---------|---------|----------|
| 38 | 0.62819 | 12116059.46 | 40693021.15 | 0.87852 | 0.48632 | -0.27439 |
| 39 | 0.45336 | 188692458.2 | 122726869.2 | 0.9211  | 0.48349 | -0.27348 |
| 40 | 0.55142 | 7042844.353 | 1881439.679 | 0.90158 | 0.51683 | -0.28491 |
| 41 | 0.54548 | 10328012.2  | 4629548.129 | 0.86544 | 0.53009 | -0.23498 |
| 42 | 0.72046 | 12282378.09 | 115801621.5 | 0.8826  | 0.4161  | -0.32904 |
| 43 | 0.46877 | 6594975.004 | 775702.8    | 0.87519 | 0.46938 | -0.23502 |
| 44 | 0.48241 | 19924009.06 | 1242525.371 | 0.83875 | 0.50683 | -0.21008 |
| 45 | 0.59889 | 31875847.77 | 112806876.1 | 0.87833 | 0.46817 | -0.296   |
| 46 | 0.58834 | 3846831.963 | 1413602.542 | 0.82331 | 0.47053 | -0.21745 |
| 47 | 0.60239 | 21394795.36 | 69840477.43 | 0.88434 | 0.55118 | -0.27631 |
| 48 | 0.52305 | 18447526.65 | 845.8611    | 0.88421 | 0.45753 | -0.24159 |
| 49 | 0.37599 | 29575334.52 | 3688.8286   | 0.89157 | 0.52448 | -0.23247 |
| 50 | 0.58446 | 50047322.16 | 118423731.8 | 0.86637 | 0.4178  | -0.2616  |
| 51 | 0.58932 | 35395259    | 75279396.73 | 0.87113 | 0.50637 | -0.27125 |
| 52 | 0.42806 | 11124290.34 | 54943.1071  | 0.87737 | 0.55454 | -0.23488 |
| 53 | 0.45089 | 6693926.091 | 93614.4242  | 0.93204 | 0.50792 | -0.30598 |
| 54 | 0.68859 | 28820538.91 | 841558322.6 | 0.86351 | 0.45076 | -0.29323 |
| 55 | 0.5527  | 9079895.127 | 1603.9697   | 0.88964 | 0.50374 | -0.25163 |
| 56 | 0.50287 | 44041945.54 | 58839374.94 | 0.83927 | 0.52951 | -0.20743 |
| 57 | 0.44866 | 3249857.229 | 38536.8276  | 0.90998 | 0.51062 | -0.27361 |
| 58 | 0.63961 | 16781531.17 | 75967242.71 | 0.86128 | 0.42095 | -0.27674 |
| 59 | 0.5947  | 17878121.52 | 41598399.93 | 0.80096 | 0.48955 | -0.22245 |
| 60 | 0.51341 | 6465705.496 | 1358244.143 | 0.88308 | 0.51367 | -0.24991 |
| 61 | 0.42374 | 5146933.139 | 7868.2727   | 0.94212 | 0.61012 | -0.33175 |
| 62 | 0.52885 | 38055942.6  | 70553636.31 | 0.86114 | 0.44734 | -0.24234 |
| 63 | 0.45183 | 14030635.05 | 1127970.222 | 0.85048 | 0.49031 | -0.22514 |
| 64 | 0.43617 | 4897908.169 | 17270       | 0.94707 | 0.56961 | -0.32389 |
| 65 | 0.48148 | 5486872.271 | 51684.7273  | 0.87992 | 0.52652 | -0.2326  |
| 66 | 0.70881 | 48430578.74 | 1663117242  | 0.69698 | 0.47907 | -0.22257 |
| 67 | 0.66202 | 20158941.45 | 128633462.2 | 0.82683 | 0.51372 | -0.27051 |
| 68 | 0.50433 | 64271442.88 | 107459958.6 | 0.82894 | 0.39106 | -0.20861 |
| 69 | 0.5437  | 11757432.98 | 3209324.667 | 0.79812 | 0.43683 | -0.19015 |
| 70 | 0.59797 | 20532544.28 | 79557200.37 | 0.90774 | 0.53143 | -0.28839 |
| 71 | 0.43215 | 6103949.245 | 9398.303    | 0.86697 | 0.44564 | -0.22049 |
| 72 | 0.51537 | 21809605.93 | 12470362.07 | 0.91048 | 0.47929 | -0.26742 |
| 73 | 0.5972  | 21211249.84 | 31308758.41 | 0.86262 | 0.5487  | -0.2595  |
| 74 | 0.64942 | 77390035.93 | 1501000285  | 0.86758 | 0.55541 | -0.29412 |
| 75 | 0.50201 | 21567965.81 | 32104154.55 | 0.8552  | 0.43949 | -0.21904 |
| 76 | 0.57047 | 22964873.54 | 36282847.83 | 0.78024 | 0.44124 | -0.20427 |
| 77 | 0.4599  | 9784281.267 | 402362.1111 | 0.87048 | 0.39626 | -0.24056 |
| 78 | 0.41728 | 6596006.258 | 20247.5294  | 0.913   | 0.47712 | -0.27641 |

|     |         |             |             |         |         |          |
|-----|---------|-------------|-------------|---------|---------|----------|
| 79  | 0.46472 | 7566898.494 | 685817.1765 | 0.8885  | 0.4928  | -0.24689 |
| 80  | 0.65061 | 7423068.106 | 1952939.9   | 0.84882 | 0.56385 | -0.26944 |
| 81  | 0.60067 | 3474891.346 | 2971886.174 | 0.77015 | 0.54017 | -0.19434 |
| 82  | 0.43197 | 6512627.476 | 6666.697    | 0.92167 | 0.37218 | -0.31212 |
| 83  | 0.45062 | 4093298.576 | 3319.5938   | 0.90808 | 0.52493 | -0.27429 |
| 84  | 0.64895 | 2934763.136 | 6684895.765 | 0.70314 | 0.46066 | -0.17624 |
| 85  | 0.59313 | 17973756.56 | 8528.8667   | 0.74119 | 0.50052 | -0.2004  |
| 86  | 0.52119 | 103967516.4 | 95189560.29 | 0.8329  | 0.54069 | -0.20803 |
| 87  | 0.54506 | 24344947.76 | 2466.5806   | 0.80613 | 0.44781 | -0.19891 |
| 88  | 0.42528 | 13215362.68 | 462690.3947 | 0.85811 | 0.53759 | -0.20863 |
| 89  | 0.39791 | 1321643.169 | 2369.1429   | 0.97168 | 0.5461  | -0.46624 |
| 90  | 0.49377 | 3771382.456 | 368938.8846 | 0.90836 | 0.49729 | -0.2973  |
| 91  | 0.66106 | 73619165.67 | 1812011416  | 0.87749 | 0.4282  | -0.31959 |
| 92  | 0.49294 | 23749763.76 | 30562.7143  | 0.84181 | 0.49416 | -0.21791 |
| 93  | 0.51943 | 8681874.018 | 735825.5    | 0.84442 | 0.42101 | -0.21815 |
| 94  | 0.4033  | 6550213.186 | 126090.3333 | 0.81122 | 0.45886 | -0.18541 |
| 95  | 0.55475 | 9372946.274 | 5262237.9   | 0.86485 | 0.45911 | -0.26409 |
| 96  | 0.70894 | 23177521.86 | 1230562932  | 0.7834  | 0.40804 | -0.2418  |
| 97  | 0.58678 | 6488418.713 | 6225378.913 | 0.77354 | 0.44055 | -0.18143 |
| 98  | 0.51738 | 13515229.34 | 792906.9333 | 0.83481 | 0.51178 | -0.21073 |
| 99  | 0.57198 | 12867666.03 | 3925539.172 | 0.81717 | 0.47398 | -0.22881 |
| 100 | 0.48301 | 3009742.748 | 968.2333    | 0.89429 | 0.51901 | -0.25743 |
| 101 | 0.638   | 9579931.816 | 49436878.21 | 0.80084 | 0.5255  | -0.23469 |
| 102 | 0.46783 | 10081886.56 | 232619.2667 | 0.87482 | 0.41674 | -0.23212 |
| 103 | 0.54758 | 14382513.28 | 241176.9444 | 0.87756 | 0.50368 | -0.24797 |
| 104 | 0.58364 | 9587801.515 | 28441332.03 | 0.80643 | 0.46087 | -0.21732 |
| 105 | 0.44    | 100829537.4 | 6908        | 0.87337 | 0.47551 | -0.21484 |
| 106 | 0.53549 | 6329710.358 | 2300158.581 | 0.83576 | 0.48164 | -0.21947 |
| 107 | 0.6156  | 11489974.64 | 21652132.06 | 0.86868 | 0.481   | -0.277   |
| 108 | 0.42836 | 6331204.249 | 431585.3939 | 0.88028 | 0.44216 | -0.25357 |
| 109 | 0.56305 | 3906087.08  | 1561115.773 | 0.76537 | 0.43099 | -0.19971 |
| 110 | 0.52744 | 4443374.794 | 556911.5789 | 0.82684 | 0.43309 | -0.21867 |
| 111 | 0.5292  | 12895294.37 | 6815953.36  | 0.8012  | 0.45436 | -0.19302 |
| 112 | 0.51656 | 6216887.14  | 34914.2963  | 0.80812 | 0.40419 | -0.21895 |

| Patient | LoG_sigma_3_mm_2D_stats_skewness_FB | Wavelet_HLL_stats_var_FB | Wavelet_LHL_stats_skewness_FB | Shape_sphericity_FB | Shape_sphericity_Disprop_FB | Wavelet_LLH_stats_mean_FB |
|---------|-------------------------------------|--------------------------|-------------------------------|---------------------|-----------------------------|---------------------------|
| 1       | -0.35786                            | 2389.7668                | 0.094947                      | 0.82513             | 1.2119                      | -42.2154                  |
| 2       | -0.11825                            | 1336.1498                | -0.086517                     | 0.8082              | 1.2373                      | -12.9757                  |
| 3       | 0.18338                             | 2021.9045                | 0.071507                      | 0.78966             | 1.2664                      | -14.1226                  |
| 4       | -0.011798                           | 957.9104                 | -0.66949                      | 0.74913             | 1.3349                      | -8.1312                   |
| 5       | -0.7393                             | 1771.9968                | 0.35904                       | 0.58699             | 1.7036                      | -4.5643                   |
| 6       | -0.51484                            | 1489.2765                | 0.1635                        | 0.76838             | 1.3014                      | -7.9585                   |
| 7       | 0.39152                             | 2872.6201                | -0.11417                      | 0.64415             | 1.5524                      | -18.0085                  |
| 8       | -0.05761                            | 2394.1956                | -0.066652                     | 0.62845             | 1.5912                      | -17.891                   |
| 9       | 1.2273                              | 544.4698                 | -0.88495                      | 0.66248             | 1.5095                      | -5.3533                   |
| 10      | -0.94008                            | 853.6161                 | 0.45303                       | 0.68104             | 1.4683                      | -1.6558                   |
| 11      | -0.14903                            | 1822.4386                | 0.17753                       | 0.77885             | 1.2839                      | -14.0369                  |
| 12      | -0.23474                            | 1530.8363                | 0.12154                       | 0.79547             | 1.2571                      | -4.8119                   |
| 13      | 0.14993                             | 878.0841                 | -0.38969                      | 0.66098             | 1.5129                      | -8.1393                   |
| 14      | -0.4534                             | 2438.6697                | 0.30285                       | 0.72854             | 1.3726                      | -6.3867                   |
| 15      | 0.014584                            | 1289.6419                | -0.13935                      | 0.79455             | 1.2586                      | -11.6303                  |
| 16      | 0.017463                            | 2794.3268                | 0.42211                       | 0.78982             | 1.2661                      | -17.5273                  |
| 17      | -0.053256                           | 2353.9354                | 0.078027                      | 0.7239              | 1.3814                      | -16.6638                  |
| 18      | -0.31956                            | 3300.5424                | -0.2644                       | 0.63414             | 1.5769                      | -25.2399                  |
| 19      | 0.20259                             | 783.7509                 | -0.13596                      | 0.76485             | 1.3075                      | -4.6474                   |
| 20      | -0.094809                           | 1840.7637                | -0.02608                      | 0.85793             | 1.1656                      | -19.458                   |
| 21      | -0.6746                             | 799.1042                 | 0.4201                        | 0.75285             | 1.3283                      | -5.026                    |
| 22      | -0.23098                            | 1605.9113                | 0.27137                       | 0.71603             | 1.3966                      | -11.0879                  |
| 23      | 0.48659                             | 741.8864                 | -0.34117                      | 0.72447             | 1.3803                      | -13.6236                  |
| 24      | -1.14                               | 2164.9433                | 0.56716                       | 0.65239             | 1.5328                      | -8.8684                   |
| 25      | 0.21146                             | 1904.4637                | -0.050421                     | 0.76927             | 1.2999                      | -11.79                    |
| 26      | 0.1545                              | 1690.5068                | -0.052253                     | 0.81229             | 1.2311                      | -11.1178                  |
| 27      | 0.0066672                           | 2338.8318                | -0.0099581                    | 0.6753              | 1.4808                      | -5.9407                   |
| 28      | 0.45067                             | 2133.3289                | -0.72879                      | 0.62477             | 1.6006                      | -17.4024                  |
| 29      | 0.8281                              | 1029.2922                | -0.40786                      | 0.69237             | 1.4443                      | -11.1277                  |
| 30      | -0.6922                             | 891.5253                 | 0.04758                       | 0.67053             | 1.4914                      | -7.067                    |
| 31      | -0.070821                           | 1253.2769                | 0.051866                      | 0.81753             | 1.2232                      | -12.6865                  |
| 32      | 0.23456                             | 2132.0594                | 0.071736                      | 0.85637             | 1.1677                      | -24.1935                  |
| 33      | 0.7841                              | 824.6878                 | -0.52374                      | 0.79048             | 1.2651                      | -11.2094                  |
| 34      | -0.15907                            | 1986.5752                | 0.38812                       | 0.83835             | 1.1928                      | -33.4541                  |
| 35      | 0.15258                             | 2681.409                 | -0.18146                      | 0.79497             | 1.2579                      | -17.7585                  |
| 36      | -0.67974                            | 645.9023                 | 0.13536                       | 0.78638             | 1.2717                      | -4.0444                   |
| 37      | 0.55861                             | 1117.1101                | -0.49198                      | 0.76293             | 1.3107                      | -21.9515                  |
| 38      | -0.19884                            | 949.6865                 | 0.088635                      | 0.69029             | 1.4487                      | -6.3946                   |
| 39      | 0.15089                             | 3524.7826                | -0.41309                      | 0.73746             | 1.356                       | 4.2152                    |

|    |           |           |           |         |        |          |
|----|-----------|-----------|-----------|---------|--------|----------|
| 40 | -0.20308  | 748.2264  | -0.86364  | 0.78305 | 1.2771 | 6.337    |
| 41 | -0.042758 | 1743.8754 | 0.20941   | 0.79027 | 1.2654 | -18.4403 |
| 42 | 0.61888   | 388.323   | -0.98428  | 0.67697 | 1.4772 | 1.026    |
| 43 | -0.2795   | 2832.5035 | 0.24458   | 0.81587 | 1.2257 | -18.5602 |
| 44 | -0.31005  | 2193.1529 | 0.30478   | 0.67194 | 1.4882 | -25.6332 |
| 45 | 0.23518   | 1764.6268 | 0.09949   | 0.73758 | 1.3558 | -11.6777 |
| 46 | 0.12831   | 902.702   | 0.031433  | 0.77845 | 1.2846 | -3.7735  |
| 47 | 0.23202   | 1888.417  | -0.17133  | 0.74917 | 1.3348 | -8.8833  |
| 48 | -0.086201 | 1553.3713 | 0.0082799 | 0.77389 | 1.2922 | -16.2786 |
| 49 | 0.15517   | 2807.0228 | -0.40672  | 0.57553 | 1.7375 | -38.0027 |
| 50 | -0.93308  | 1426.5465 | 0.47214   | 0.7264  | 1.3766 | -4.6457  |
| 51 | -0.096419 | 1520.0167 | -0.25702  | 0.73746 | 1.356  | -6.291   |
| 52 | -0.21517  | 2722.7512 | 0.10263   | 0.75581 | 1.3231 | -29.818  |
| 53 | -0.36436  | 3896.1541 | 0.20882   | 0.82123 | 1.2177 | -30.8803 |
| 54 | 0.68684   | 516.1792  | -0.29521  | 0.72603 | 1.3774 | -5.7547  |
| 55 | -0.042074 | 1857.854  | -0.192    | 0.78052 | 1.2812 | -9.529   |
| 56 | -0.54878  | 3998.5805 | 0.46845   | 0.67156 | 1.4891 | -13.1572 |
| 57 | -0.029825 | 3932.6764 | -0.065845 | 0.83137 | 1.2028 | -18.7982 |
| 58 | -0.43003  | 643.0891  | 0.55326   | 0.71252 | 1.4035 | -4.2515  |
| 59 | -0.14238  | 1030.0243 | 0.29374   | 0.80395 | 1.2439 | -10.6663 |
| 60 | 0.041156  | 2310.9615 | -0.050558 | 0.84182 | 1.1879 | -2.454   |
| 61 | -0.5936   | 2828.8926 | 0.68388   | 0.85513 | 1.1694 | -46.4409 |
| 62 | 0.28238   | 761.7348  | -0.53185  | 0.68811 | 1.4533 | -0.37912 |
| 63 | 0.14366   | 2244.2531 | -0.096128 | 0.73249 | 1.3652 | -37.0329 |
| 64 | -0.20054  | 3897.52   | 0.15015   | 0.76537 | 1.3066 | -6.0001  |
| 65 | 0.036683  | 1256.2988 | -0.046973 | 0.83504 | 1.1976 | -17.4838 |
| 66 | 1.2234    | 388.3378  | -0.98608  | 0.7624  | 1.3116 | -10.8104 |
| 67 | 0.61977   | 1574.0374 | -0.54646  | 0.69703 | 1.4347 | -8.3878  |
| 68 | -0.69033  | 1734.9401 | 0.48829   | 0.59438 | 1.6824 | -6.0776  |
| 69 | 0.11888   | 1716.155  | -0.12508  | 0.79356 | 1.2601 | -18.0172 |
| 70 | -0.76568  | 902.0037  | 0.37183   | 0.74701 | 1.3387 | -0.88596 |
| 71 | -0.039494 | 2242.8345 | 0.11961   | 0.6202  | 1.6124 | -20.2158 |
| 72 | 0.0067719 | 2138.3255 | -0.27652  | 0.77836 | 1.2848 | -6.0435  |
| 73 | -0.2588   | 951.7297  | 0.47599   | 0.76115 | 1.3138 | -8.803   |
| 74 | -1.0016   | 889.4405  | 1.8163    | 0.8089  | 1.2363 | -7.8651  |
| 75 | -0.40224  | 2397.4282 | 0.040045  | 0.7786  | 1.2843 | -16.0555 |
| 76 | 0.53815   | 1343.3724 | -0.19741  | 0.74067 | 1.3501 | -18.8057 |
| 77 | -0.072067 | 1874.3743 | 0.59616   | 0.82751 | 1.2084 | -37.2777 |
| 78 | -0.14767  | 2583.5642 | 0.33974   | 0.836   | 1.1962 | -28.5362 |
| 79 | 0.57607   | 3654.3071 | 0.092928  | 0.81787 | 1.2227 | -28.1191 |
| 80 | 0.59558   | 932.1737  | 1.4112    | 0.75481 | 1.3248 | -13.1087 |



|     |            |           |           |         |        |          |
|-----|------------|-----------|-----------|---------|--------|----------|
| 81  | 0.4088     | 1243.2203 | -0.40262  | 0.80824 | 1.2373 | -15.2995 |
| 82  | -0.3829    | 3404.2885 | 0.28156   | 0.86114 | 1.1613 | -40.0644 |
| 83  | 0.075764   | 4935.3441 | 0.45669   | 0.83419 | 1.1988 | -23.1148 |
| 84  | 0.28193    | 637.3764  | 0.073695  | 0.8284  | 1.2071 | -10.0203 |
| 85  | 0.52786    | 1236.6318 | -0.50093  | 0.75881 | 1.3179 | -27.8615 |
| 86  | -0.51385   | 2059.5799 | 0.024047  | 0.69465 | 1.4396 | -10.0982 |
| 87  | 0.22573    | 1386.4023 | 0.017432  | 0.7255  | 1.3784 | -25.6248 |
| 88  | -0.55143   | 3415.1697 | 0.43607   | 0.83348 | 1.1998 | -20.8188 |
| 89  | 0.21245    | 6721.0754 | 0.12343   | 0.89843 | 1.1131 | -30.5313 |
| 90  | 0.074465   | 1963.3446 | 0.1924    | 0.85886 | 1.1643 | -33.1776 |
| 91  | -1.3474    | 655.402   | 0.67662   | 0.66478 | 1.5043 | 0.769    |
| 92  | 0.18021    | 2603.9982 | 0.081053  | 0.69155 | 1.446  | -22.6147 |
| 93  | 0.29283    | 2376.3721 | -0.15157  | 0.76884 | 1.3007 | -30.8148 |
| 94  | -0.35036   | 2634.5243 | 0.005197  | 0.77653 | 1.2878 | -26.9254 |
| 95  | 0.25201    | 1344.9396 | -0.53766  | 0.80142 | 1.2478 | -19.1832 |
| 96  | 0.31675    | 461.3516  | 0.63856   | 0.67307 | 1.4857 | -3.2006  |
| 97  | -0.86109   | 1217.2528 | -0.05488  | 0.76819 | 1.3018 | -16.4403 |
| 98  | 0.090516   | 1757.3685 | 0.13608   | 0.77935 | 1.2831 | -28.4715 |
| 99  | 0.39593    | 1215.4315 | -0.49194  | 0.76985 | 1.299  | -12.8788 |
| 100 | 0.015991   | 2170.6092 | -0.14737  | 0.75453 | 1.3253 | -20.5929 |
| 101 | 0.32523    | 1422.5039 | 0.53729   | 0.76438 | 1.3082 | -9.0802  |
| 102 | 0.00078603 | 1904.8019 | 0.022086  | 0.76727 | 1.3033 | -28.737  |
| 103 | 0.32658    | 2178.6373 | -0.49359  | 0.72182 | 1.3854 | -21.3682 |
| 104 | 0.19014    | 2761.0426 | 0.41947   | 0.59406 | 1.6833 | -12.0935 |
| 105 | -0.14583   | 2915.4934 | -0.035473 | 0.55881 | 1.7895 | -10.1398 |
| 106 | 0.27238    | 2700.7792 | 0.27038   | 0.74069 | 1.3501 | -18.465  |
| 107 | 0.33945    | 890.983   | -0.066227 | 0.8008  | 1.2488 | -17.3253 |
| 108 | -0.17412   | 3825.0453 | 0.29083   | 0.80551 | 1.2415 | -30.4355 |
| 109 | 0.32326    | 972.7149  | -0.066742 | 0.80972 | 1.235  | -17.2802 |
| 110 | -0.091071  | 968.6202  | 0.074051  | 0.80118 | 1.2482 | -14.4725 |
| 111 | -0.64772   | 1649.6344 | 0.26961   | 0.67837 | 1.4741 | -22.2949 |
| 112 | 0.077216   | 2278.7042 | 0.46802   | 0.82306 | 1.215  | -28.4652 |

| Patient | Wavelet_HHL_stats_range_FB | LoG_sigma_3_mm_3D_glcmlusProm_FB | Wavelet_HLH_glcmlcorrel1_FB | LoG_sigma_3_mm_2D_glcmlusShade_FB | Wavelet_HLH_stats_min_FB | Wavelet_LLL_stats_max_FB |
|---------|----------------------------|----------------------------------|-----------------------------|-----------------------------------|--------------------------|--------------------------|
| 1       | 72.5515                    | 7051.3905                        | 0.30696                     | -217.1364                         | -33.7231                 | 72.4123                  |
| 2       | 94.1545                    | 1063.0069                        | 0.26213                     | -5.0763                           | -34.3683                 | 305.9109                 |
| 3       | 74.0045                    | 1510.2683                        | 0.22628                     | 7.9322                            | -25.8659                 | 167.8259                 |
| 4       | 109.8245                   | 829.8069                         | 0.2274                      | 12.3717                           | -88.7166                 | 1357.7351                |
| 5       | 140.5814                   | 2568.4351                        | 0.25143                     | -32.6375                          | -53.6967                 | 227.3483                 |
| 6       | 111.6469                   | 1183.681                         | 0.28129                     | -16.0184                          | -49.1173                 | 245.1256                 |
| 7       | 99.1869                    | 615.4896                         | 0.31113                     | 16.1248                           | -32.2618                 | 322.5872                 |
| 8       | 111.4955                   | 4340.5382                        | 0.28293                     | -3.1113                           | -44.4196                 | 938.2278                 |
| 9       | 115.051                    | 332.6773                         | 0.24417                     | 13.6712                           | -46.2831                 | 619.029                  |
| 10      | 102.8135                   | 336.4637                         | 0.12997                     | -6.4838                           | -103.7312                | 1352.7483                |
| 11      | 102.5267                   | 1230.7145                        | 0.27362                     | -5.3672                           | -52.4397                 | 207.1107                 |
| 12      | 78.4287                    | 1203.1524                        | 0.24667                     | -12.5328                          | -36.4498                 | 348.1712                 |
| 13      | 66.544                     | 349.2557                         | 0.24251                     | 7.1001                            | -37.0691                 | 276.4866                 |
| 14      | 103.6258                   | 3174.1721                        | 0.29633                     | -45.0226                          | -43.0625                 | 412.8715                 |
| 15      | 66.9022                    | 799.6143                         | 0.23616                     | 8.8489                            | -37.3733                 | 179.2264                 |
| 16      | 94.1515                    | 2645.1808                        | 0.27045                     | 7.263                             | -42.9854                 | 169.6732                 |
| 17      | 113.5243                   | 1569.797                         | 0.28567                     | 0.98436                           | -37.6285                 | 432.4042                 |
| 18      | 128.8009                   | 16565.0966                       | 0.29089                     | -169.5963                         | -61.924                  | 657.9732                 |
| 19      | 81.9325                    | 131.0227                         | 0.22786                     | 2.8561                            | -30.8341                 | 302.3006                 |
| 20      | 59.269                     | 524.3533                         | 0.27448                     | 0.59088                           | -41.0478                 | 294.2781                 |
| 21      | 83.6127                    | 399.4885                         | 0.24708                     | -10.3463                          | -31.4089                 | 274.7357                 |
| 22      | 98.9095                    | 982.7564                         | 0.2326                      | -4.6636                           | -57.5326                 | 354.4508                 |
| 23      | 106.6227                   | 468.6728                         | 0.25048                     | 16.4899                           | -44.9678                 | 516.2502                 |
| 24      | 108.7292                   | 5904.1881                        | 0.27042                     | -111.4184                         | -38.2376                 | 224.7796                 |
| 25      | 80.4857                    | 872.1726                         | 0.2684                      | 9.3842                            | -40.2451                 | 373.7802                 |
| 26      | 117.7012                   | 793.1117                         | 0.2266                      | 8.0296                            | -35.8917                 | 411.8757                 |
| 27      | 113.7879                   | 2249.5948                        | 0.27094                     | -4.1804                           | -58.6824                 | 370.4321                 |
| 28      | 79.5399                    | 1501.4787                        | 0.28791                     | 40.348                            | -41.4978                 | 360.2708                 |
| 29      | 95.2195                    | 564.3519                         | 0.27757                     | 20.7624                           | -52.1683                 | 321.0289                 |
| 30      | 104.1634                   | 2447.098                         | 0.23297                     | -45.417                           | -57.6731                 | 352.77                   |
| 31      | 84.3815                    | 673.9146                         | 0.2531                      | 5.8193                            | -43.6501                 | 169.2921                 |
| 32      | 56.0846                    | 1025.646                         | 0.26798                     | 8.3208                            | -23.6415                 | 142.4491                 |
| 33      | 67.5209                    | 372.106                          | 0.23161                     | 22.9338                           | -52.2843                 | 191.7209                 |
| 34      | 71.7028                    | 2028.6893                        | 0.31301                     | -11.6724                          | -30.5452                 | 124.7866                 |
| 35      | 67.504                     | 941.1981                         | 0.31519                     | 10.7052                           | -49.9711                 | 255.684                  |
| 36      | 63.6785                    | 195.3849                         | 0.25128                     | -5.5145                           | -35.5322                 | 160.6152                 |
| 37      | 112.149                    | 1195.6584                        | 0.23957                     | 42.5137                           | -42.2653                 | 165.9093                 |
| 38      | 65.8625                    | 330.7922                         | 0.25387                     | -1.5708                           | -28.9941                 | 312.7067                 |
| 39      | 176.2654                   | 6471.4307                        | 0.2751                      | 39.9599                           | -72.9584                 | 361.0067                 |

|    |          |           |         |          |          |          |
|----|----------|-----------|---------|----------|----------|----------|
| 40 | 66.9197  | 1175.6272 | 0.28362 | 0.32617  | -40.645  | 318.8042 |
| 41 | 65.6662  | 643.9789  | 0.2623  | 1.1126   | -41.1709 | 167.1869 |
| 42 | 53.7527  | 156.814   | 0.21406 | 6.0216   | -57.6718 | 521.4413 |
| 43 | 119.5832 | 1864.9513 | 0.25562 | -17.115  | -37.7526 | 141.3369 |
| 44 | 99.2     | 1440.7628 | 0.29297 | -13.8775 | -35.224  | 221.3228 |
| 45 | 104.3989 | 1616.0944 | 0.26033 | 24.7603  | -41.2724 | 213.9988 |
| 46 | 61.5387  | 184.2801  | 0.2442  | 2.3625   | -26.7888 | 179.8807 |
| 47 | 76.7769  | 515.8877  | 0.27499 | 8.1856   | -40.118  | 195.4081 |
| 48 | 99.1275  | 2007.2987 | 0.25952 | 9.7016   | -38.1078 | 286.3909 |
| 49 | 113.0496 | 8539.1572 | 0.2803  | 21.3268  | -41.5048 | 251.9802 |
| 50 | 97.5826  | 2502.5519 | 0.22731 | -55.9981 | -55.7228 | 263.8318 |
| 51 | 111.8893 | 1262.8819 | 0.25864 | 2.9696   | -39.8188 | 304.6579 |
| 52 | 73.537   | 2331.7349 | 0.30264 | -23.4979 | -57.2459 | 13.2085  |
| 53 | 61.0737  | 1577.7804 | 0.25466 | -20.5292 | -38.2014 | 104.9768 |
| 54 | 95.0035  | 184.9338  | 0.22192 | 8.22     | -28.197  | 396.6098 |
| 55 | 63.6039  | 782.7032  | 0.26134 | 1.1431   | -38.7952 | 293.9885 |
| 56 | 142.7237 | 5100.3609 | 0.28286 | -60.2315 | -56.2768 | 372.4091 |
| 57 | 76.3681  | 1981.7118 | 0.29802 | -4.2008  | -25.9741 | 117.9854 |
| 58 | 80.8013  | 271.1645  | 0.21136 | -4.0259  | -36.1637 | 352.5338 |
| 59 | 98.6895  | 746.3473  | 0.26931 | 5.3733   | -46.6533 | 237.0342 |
| 60 | 86.7955  | 1133.333  | 0.22005 | 3.8417   | -29.373  | 143.1915 |
| 61 | 61.4213  | 1564.5989 | 0.30867 | -38.7748 | -29.4476 | 362.4428 |
| 62 | 85.4318  | 890.2207  | 0.23304 | 11.5813  | -34.3771 | -83.8225 |
| 63 | 73.1348  | 1782.6076 | 0.29144 | 30.4729  | -44.0575 | 191.2674 |
| 64 | 65.6003  | 3829.9649 | 0.29829 | -37.2437 | -38.3643 | 296.5485 |
| 65 | 60.7692  | 1029.3916 | 0.25687 | 0.01108  | -27.1396 | 90.1546  |
| 66 | 72.6651  | 177.2534  | 0.21315 | 15.6805  | -54.5803 | 352.1513 |
| 67 | 116.9804 | 573.5873  | 0.28214 | 20.8671  | -48.9026 | 250.2455 |
| 68 | 111.4256 | 3690.7804 | 0.22747 | -66.9242 | -62.8215 | 223.8533 |
| 69 | 89.3352  | 641.2977  | 0.26313 | 9.9947   | -41.8407 | 260.5807 |
| 70 | 75.7392  | 808.553   | 0.27691 | -20.4965 | -68.4415 | 402.2644 |
| 71 | 93.0372  | 1754.5132 | 0.25799 | -8.5124  | -31.6148 | 158.2015 |
| 72 | 111.7844 | 1479.2185 | 0.28721 | -3.366   | -36.7679 | 128.0775 |
| 73 | 89.4235  | 873.4321  | 0.26345 | -6.3263  | -38.1972 | 259.1891 |
| 74 | 109.6509 | 2235.9165 | 0.2893  | -48.4873 | -57.6467 | 620.1388 |
| 75 | 106.0898 | 2107.6932 | 0.28042 | -21.4627 | -81.1792 | 390.6434 |
| 76 | 102.5225 | 964.8676  | 0.24192 | 30.6018  | -57.431  | 265.9828 |
| 77 | 128.4303 | 1329.6293 | 0.24817 | 10.5716  | -43.3493 | 197.1496 |
| 78 | 89.2489  | 2921.0112 | 0.29027 | -20.9162 | -31.4685 | 167.114  |
| 79 | 76.89    | 2209.9394 | 0.27702 | 53.3933  | -44.7508 | 140.3049 |
| 80 | 118.9611 | 316.0501  | 0.21478 | 13.1846  | -28.1552 | 234.6016 |

|     |          |           |         |          |          |           |
|-----|----------|-----------|---------|----------|----------|-----------|
| 81  | 57.7169  | 277.9353  | 0.22943 | 6.5542   | -26.9896 | 223.1065  |
| 82  | 107.7536 | 1148.2052 | 0.28517 | -25.4299 | -24.0504 | 195.1325  |
| 83  | 98.842   | 2336.8379 | 0.28574 | 17.2828  | -41.4103 | 365.0439  |
| 84  | 58.1942  | 121.8111  | 0.23217 | 5.9821   | -45.0789 | 122.8023  |
| 85  | 80.3444  | 644.0518  | 0.28406 | 29.8477  | -50.7494 | 184.2535  |
| 86  | 120.535  | 8208.7839 | 0.27082 | -98.5425 | -58.9281 | 337.2505  |
| 87  | 98.3177  | 1260.2543 | 0.23977 | 29.8402  | -58.1276 | 303.7733  |
| 88  | 85.0066  | 4068.835  | 0.26914 | -95.4186 | -45.4008 | 241.2818  |
| 89  | 66.2496  | 1470.1602 | 0.18639 | -6.2148  | -22.3359 | -61.0974  |
| 90  | 53.2649  | 602.152   | 0.33056 | 3.3517   | -45.3366 | 172.6321  |
| 91  | 113.6847 | 743.5611  | 0.20155 | -23.6732 | -61.4037 | 984.8512  |
| 92  | 88.2183  | 1835.4392 | 0.26966 | 29.717   | -34.4382 | 201.9343  |
| 93  | 85.6329  | 864.6791  | 0.27915 | 16.8982  | -53.0144 | 200.4765  |
| 94  | 89.43    | 2992.7439 | 0.25038 | -61.6495 | -51.2142 | -8.0089   |
| 95  | 89.0944  | 718.0889  | 0.26746 | 16.9952  | -35.4178 | 228.4104  |
| 96  | 111.2783 | 204.1864  | 0.20154 | 3.081    | -45.6024 | 566.7353  |
| 97  | 62.0707  | 1189.0419 | 0.22799 | -28.0694 | -47.4151 | 365.4718  |
| 98  | 78.5929  | 749.3342  | 0.26321 | 9.2575   | -27.401  | 394.5742  |
| 99  | 82.0459  | 832.7156  | 0.24979 | 24.7953  | -37.1004 | 296.2988  |
| 100 | 77.5061  | 908.2061  | 0.24709 | 0.22129  | -26.4044 | 91.4708   |
| 101 | 65.1464  | 578.3533  | 0.2558  | 8.5646   | -35.7998 | 217.6161  |
| 102 | 75.1964  | 1574.1172 | 0.25936 | 4.3691   | -39.4454 | 64.5462   |
| 103 | 71.6024  | 973.1526  | 0.27215 | 17.6026  | -42.9093 | 326.5725  |
| 104 | 120.2247 | 679.0298  | 0.28541 | 10.1633  | -56.9908 | 208.4469  |
| 105 | 146.6453 | 4616.0789 | 0.26663 | -29.0411 | -70.1469 | 371.8825  |
| 106 | 87.804   | 884.7841  | 0.27062 | 19.5664  | -47.21   | 249.55    |
| 107 | 68.2124  | 565.8208  | 0.24822 | 10.5239  | -37.1296 | 400.7409  |
| 108 | 116.1178 | 2238.9417 | 0.23042 | -8.9921  | -41.3957 | 169.0003  |
| 109 | 60.2888  | 432.5573  | 0.26362 | 15.1043  | -29.2154 | 145.755   |
| 110 | 81.8819  | 506.5145  | 0.28378 | -5.8535  | -39.8476 | -549.3492 |
| 111 | 126.7801 | 2735.6072 | 0.23425 | -47.0685 | -61.7431 | 424.391   |
| 112 | 94.2814  | 478.9221  | 0.28589 | 10.4266  | -26.2048 | 141.6223  |

| Patient | Wavelet_HL<br>L_stats_max<br>_FB | LoG_sigma_3_m<br>m_3D_glcm_hom<br>ogeneity1_AIP | Wavelet_HHL<br>_stats_range_<br>AIP | GLCM_c<br>orrel1_A<br>IP | Wavelet_LHH_glszm<br>_largeAreaEmphasis<br>_AIP | Wavelet_LLL_gl<br>cm_clusShade_<br>AIP |
|---------|----------------------------------|-------------------------------------------------|-------------------------------------|--------------------------|-------------------------------------------------|----------------------------------------|
| 1       | 92.3554                          | 0.48431                                         | 54.1571                             | 0.70441                  | 171.5217                                        | 415.7152                               |
| 2       | 159.8651                         | 0.65469                                         | 39.5987                             | 0.89782                  | 239.6471                                        | 653.2389                               |
| 3       | 172.0044                         | 0.65968                                         | 38.676                              | 0.84686                  | 2680.2727                                       | 17.3788                                |
| 4       | 214.185                          | 0.70335                                         | 110.1923                            | 0.82617                  | 6516574.667                                     | -1881.0636                             |
| 5       | 199.4582                         | 0.65579                                         | 123.1914                            | 0.83865                  | 549990.3684                                     | -2157.4014                             |
| 6       | 231.8443                         | 0.68642                                         | 49.8807                             | 0.94398                  | 256197.6176                                     | -1892.266                              |
| 7       | 180.2212                         | 0.62991                                         | 63.3736                             | 0.87981                  | 6288.6429                                       | -3804.3826                             |
| 8       | 191.713                          | 0.49232                                         | 168.0715                            | 0.71412                  | 91.25                                           | -3085.0241                             |
| 9       | 181.3438                         | 0.74503                                         | 183.2954                            | 0.83597                  | 56327855                                        | -1469.1052                             |
| 10      | 239.9834                         | 0.75923                                         | 84.1523                             | 0.80898                  | 3445859                                         | -228.2117                              |
| 11      | 167.3623                         | 0.64871                                         | 36.4602                             | 0.9004                   | 92935.4667                                      | 357.7479                               |
| 12      | 148.8832                         | 0.59389                                         | 34.1524                             | 0.88143                  | 9944.5357                                       | -22.4844                               |
| 13      | 157.0229                         | 0.64873                                         | 116.3817                            | 0.7586                   | 413314.9333                                     | -858.1668                              |
| 14      | 200.0578                         | 0.5975                                          | 75.8534                             | 0.84521                  | 108286.0833                                     | -4535.6752                             |
| 15      | 142.6737                         | 0.55408                                         | 66.9279                             | 0.72829                  | 17718.5517                                      | -1122.131                              |
| 16      | 216.7343                         | 0.61392                                         | 58.5521                             | 0.90326                  | 5049.8333                                       | 1016.674                               |
| 17      | 212.8955                         | 0.56846                                         | 69.7718                             | 0.86459                  | 17201.8065                                      | -904.2355                              |
| 18      | 212.0837                         | 0.44763                                         | 104.2523                            | 0.81057                  | 5.2889                                          | -7277.5186                             |
| 19      | 202.8186                         | 0.75244                                         | 40.2841                             | 0.80527                  | 446049.9583                                     | -66.2645                               |
| 20      | 126.5483                         | 0.66447                                         | 29.0461                             | 0.90204                  | 16185.5556                                      | 703.2986                               |
| 21      | 113.9562                         | 0.68239                                         | 59.7481                             | 0.92309                  | 147122.3077                                     | -367.0443                              |
| 22      | 142.5991                         | 0.63328                                         | 45.929                              | 0.85499                  | 68902.6786                                      | -1009.7565                             |
| 23      | 146.9346                         | 0.65012                                         | 101.2388                            | 0.78204                  | 4.575                                           | -1356.2813                             |
| 24      | 257.14                           | 0.60566                                         | 37.2404                             | 0.91114                  | 14126.7813                                      | -883.0377                              |
| 25      | 156.8409                         | 0.66399                                         | 57.7496                             | 0.87539                  | 492283.9706                                     | -2261.3555                             |
| 26      | 140.0386                         | 0.64783                                         | 55.2845                             | 0.89532                  | 35533.9688                                      | -1131.1406                             |
| 27      | 193.8843                         | 0.56486                                         | 77.4457                             | 0.90457                  | 84242.2051                                      | 317.2208                               |
| 28      | 147.7568                         | 0.59848                                         | 54.1681                             | 0.79371                  | 1136.3714                                       | -1853.7148                             |
| 29      | 201.0824                         | 0.72868                                         | 54.7354                             | 0.95323                  | 10269855.03                                     | -3761.0253                             |
| 30      | 213.1548                         | 0.64872                                         | 46.5384                             | 0.89331                  | 21.4483                                         | -1016.5618                             |
| 31      | 214.5397                         | 0.65806                                         | 67.8079                             | 0.8689                   | 25797.5                                         | -1542.8514                             |
| 32      | 134.3368                         | 0.67628                                         | 32.2597                             | 0.90198                  | 3763.5926                                       | 165.8203                               |
| 33      | 175.7911                         | 0.70439                                         | 40.9924                             | 0.90526                  | 288458.2647                                     | -2455.0516                             |
| 34      | 132.4292                         | 0.59487                                         | 47.4632                             | 0.86507                  | 17.1714                                         | -370.5353                              |
| 35      | 154.905                          | 0.52333                                         | 68.2554                             | 0.80926                  | 57442.303                                       | -3066.2283                             |
| 36      | 125.031                          | 0.68619                                         | 65.9179                             | 0.77814                  | 170231                                          | -515.1736                              |
| 37      | 155.7783                         | 0.58631                                         | 101.9278                            | 0.78783                  | 12.1471                                         | -2509.8053                             |
| 38      | 129.9754                         | 0.66705                                         | 72.5361                             | 0.83708                  | 67268.7429                                      | -1015.239                              |
| 39      | 254.2047                         | 0.51062                                         | 98.508                              | 0.91989                  | 6.8                                             | 3447.7452                              |

|    |          |         |          |         |             |            |
|----|----------|---------|----------|---------|-------------|------------|
| 40 | 82.7541  | 0.65686 | 29.3384  | 0.90216 | 52068.3043  | -115.863   |
| 41 | 152.7761 | 0.64333 | 40.2985  | 0.88143 | 9032        | -615.8618  |
| 42 | 94.6104  | 0.75249 | 34.5291  | 0.96811 | 2622581.033 | -1712.5698 |
| 43 | 155.2288 | 0.56426 | 62.8237  | 0.83676 | 202.3667    | 69.8304    |
| 44 | 156.1288 | 0.52499 | 72.4297  | 0.78263 | 38.7857     | -1517.7669 |
| 45 | 215.197  | 0.6173  | 113.444  | 0.85611 | 286540.4615 | -4741.5825 |
| 46 | 114.0949 | 0.59115 | 54.8972  | 0.7834  | 8694.3043   | -342.3278  |
| 47 | 205.1388 | 0.65927 | 68.2972  | 0.85359 | 2.6471      | -2077.3771 |
| 48 | 162.3721 | 0.639   | 47.2475  | 0.92277 | 49568.8     | 501.8615   |
| 49 | 131.1174 | 0.43441 | 116.2441 | 0.84176 | 24.619      | 2604.2254  |
| 50 | 229.3103 | 0.68211 | 45.6383  | 0.94251 | 58203.2581  | -642.7875  |
| 51 | 203.6599 | 0.64215 | 104.5713 | 0.90146 | 924105.7568 | -1920.1056 |
| 52 | 150.3982 | 0.46587 | 54.2508  | 0.69956 | 4.5161      | -512.2985  |
| 53 | 195.6364 | 0.45874 | 74.8003  | 0.69459 | 198.5625    | -435.0152  |
| 54 | 154.8898 | 0.76431 | 54.5751  | 0.96524 | 8786145.464 | -1851.4331 |
| 55 | 122.6354 | 0.67659 | 43.0639  | 0.90984 | 43936.6     | 503.0393   |
| 56 | 281.9961 | 0.5751  | 104.0683 | 0.87005 | 280891.8182 | -3068.2502 |
| 57 | 95.4819  | 0.48262 | 63.7117  | 0.78634 | 353.2857    | -404.4843  |
| 58 | 163.6425 | 0.73582 | 35.8674  | 0.92363 | 181870.92   | -339.6446  |
| 59 | 174.2463 | 0.65125 | 67.948   | 0.8427  | 100692.5357 | -1429.6337 |
| 60 | 119.1498 | 0.59848 | 30.1119  | 0.87562 | 6489.6563   | -587.1304  |
| 61 | 146.4541 | 0.50132 | 31.4308  | 0.72237 | 13.375      | -154.6385  |
| 62 | 141.127  | 0.59396 | 50.4712  | 0.87978 | 487701.88   | -66.3609   |
| 63 | 108.8714 | 0.49729 | 59.3819  | 0.73877 | 2326.2667   | -964.0768  |
| 64 | 138.7286 | 0.49904 | 66.1551  | 0.84321 | 6.0857      | -908.9024  |
| 65 | 99.5042  | 0.55928 | 40.2149  | 0.81943 | 960.7778    | 414.2229   |
| 66 | 121.7526 | 0.79971 | 40.1958  | 0.77326 | 10889837.24 | -70.1927   |
| 67 | 169.8631 | 0.70899 | 56.6697  | 0.85409 | 248844.2857 | -2027.1367 |
| 68 | 206.6098 | 0.57954 | 93.5135  | 0.86447 | 36.6296     | -451.836   |
| 69 | 153.1533 | 0.62175 | 38.064   | 0.81013 | 37483.3704  | -802.7963  |
| 70 | 176.5748 | 0.67609 | 36.9464  | 0.93369 | 518144.9259 | 96.509     |
| 71 | 118.7827 | 0.47138 | 104.5816 | 0.78381 | 31.3548     | 388.4632   |
| 72 | 283.7155 | 0.68025 | 39.5467  | 0.93012 | 51137.6207  | 668.9658   |
| 73 | 185.4219 | 0.65444 | 68.328   | 0.87535 | 138759.9063 | -2277.8642 |
| 74 | 224.0459 | 0.72048 | 126.7329 | 0.94551 | 20024727.61 | -1956.9732 |
| 75 | 194.5066 | 0.59776 | 57.2188  | 0.87114 | 9610.5      | -418.9557  |
| 76 | 195.3369 | 0.65172 | 51.0102  | 0.82089 | 12712.75    | -764.0955  |
| 77 | 104.7346 | 0.48172 | 86.9791  | 0.7313  | 19.8667     | -1101.9908 |
| 78 | 122.9628 | 0.50215 | 58.3803  | 0.74158 | 29.5926     | -412.4289  |
| 79 | 193.2861 | 0.53761 | 59.494   | 0.81452 | 14.1818     | -1888.353  |
| 80 | 139.2569 | 0.71205 | 69.989   | 0.84934 | 132947.52   | -849.6022  |

|     |          |         |          |         |             |            |
|-----|----------|---------|----------|---------|-------------|------------|
| 81  | 121.4365 | 0.70513 | 38.2355  | 0.77023 | 9390.0952   | -160.312   |
| 82  | 163.1432 | 0.40714 | 70.299   | 0.68602 | 227.2667    | -2294.6661 |
| 83  | 249.0093 | 0.57124 | 45.6735  | 0.82544 | 664.9167    | 56.2349    |
| 84  | 115.8078 | 0.72184 | 33.2123  | 0.72894 | 36120.0556  | -112.137   |
| 85  | 140.4146 | 0.60484 | 111.4388 | 0.69461 | 47845.8235  | -980.6016  |
| 86  | 294.4683 | 0.52199 | 118.3109 | 0.81335 | 427545.5417 | -7490.8882 |
| 87  | 200.7649 | 0.5484  | 89.0817  | 0.80686 | 4272.2059   | -2199.6462 |
| 88  | 170.8328 | 0.60242 | 49.3263  | 0.82882 | 4255.037    | -4.7678    |
| 89  | 167.2945 | 0.51815 | 54.4497  | 0.69917 | 8.4815      | 187.7027   |
| 90  | 93.468   | 0.59329 | 44.2129  | 0.82513 | 468.7407    | -616.5373  |
| 91  | 226.6982 | 0.68677 | 107.004  | 0.94434 | 17188875.84 | -909.2152  |
| 92  | 184.1217 | 0.53951 | 50.1258  | 0.8243  | 12.2        | -1234.0997 |
| 93  | 159.623  | 0.56119 | 58.5503  | 0.82556 | 3.2692      | -371.5433  |
| 94  | 114.8526 | 0.46188 | 60.4415  | 0.65144 | 81.625      | -337.1588  |
| 95  | 118.5966 | 0.66107 | 34.5359  | 0.88954 | 6260.4063   | -153.8322  |
| 96  | 170.991  | 0.73794 | 67.2669  | 0.91575 | 4294015.276 | -628.851   |
| 97  | 145.0703 | 0.7097  | 37.7986  | 0.8531  | 72272.0909  | -139.8633  |
| 98  | 158.658  | 0.60016 | 46.0516  | 0.80932 | 2666.7037   | -495.3779  |
| 99  | 135.0012 | 0.59634 | 82.1584  | 0.72494 | 23892.8387  | -1180.0419 |
| 100 | 123.5325 | 0.50058 | 59.9024  | 0.69759 | 257.1667    | 103.8212   |
| 101 | 144.098  | 0.72043 | 32.3108  | 0.94751 | 130207.7667 | -839.5755  |
| 102 | 150.3473 | 0.45785 | 100.2435 | 0.81521 | 19.5152     | -393.8395  |
| 103 | 147.202  | 0.66161 | 32.768   | 0.88367 | 1806.0333   | -322.3525  |
| 104 | 292.9915 | 0.62187 | 67.4979  | 0.76052 | 128156.7037 | -938.8145  |
| 105 | 242.1818 | 0.48865 | 152.6672 | 0.87594 | 3.4872      | 5.8521     |
| 106 | 123.9017 | 0.5094  | 73.6239  | 0.76851 | 5.3333      | -1863.3785 |
| 107 | 111.2709 | 0.66722 | 54.1387  | 0.92523 | 30975.2121  | -972.1638  |
| 108 | 140.7376 | 0.45224 | 112.1822 | 0.69022 | 156.9091    | -2439.0078 |
| 109 | 129.439  | 0.57896 | 88.2457  | 0.65969 | 4209.2759   | -394.8184  |
| 110 | 79.308   | 0.51203 | 95.8519  | 0.7069  | 1651.6364   | -47.8925   |
| 111 | 164.9898 | 0.56482 | 105.0619 | 0.78684 | 6353.7931   | -919.2539  |
| 112 | 143.1821 | 0.52586 | 91.4176  | 0.68414 | 1693.9655   | -873.124   |

| Patient | LoG_sigma_3_mm_3D_stats_skewness_AIP | Wavelet_LL_H_stats_skewness_AIP | Shape_spherDisprop_AIP | LoG_sigma_3_mm_2D_glcmlusProm_AIP | LoG_sigma_3_mm_2D_stats_skewness_AIP | Wavelet_HH_L_stats_kurtosis_AIP | Shape_sphericity_AIP |
|---------|--------------------------------------|---------------------------------|------------------------|-----------------------------------|--------------------------------------|---------------------------------|----------------------|
| 1       | 0.19813                              | 0.10597                         | 1.4537                 | 392.846                           | 0.20965                              | 3.3606                          | 0.68788              |
| 2       | -0.092863                            | 0.055561                        | 1.2321                 | 56.197                            | -0.071329                            | 5.7026                          | 0.81165              |
| 3       | 0.037662                             | 1.9892                          | 1.3542                 | 88.8496                           | -0.087068                            | 4.7329                          | 0.73844              |
| 4       | 0.061299                             | -0.11937                        | 1.3642                 | 382.0844                          | -0.063852                            | 13.4088                         | 0.73303              |
| 5       | -0.47258                             | 0.10855                         | 1.7295                 | 849.399                           | -0.29951                             | 9.1365                          | 0.5782               |
| 6       | -0.40784                             | 0.65785                         | 1.2973                 | 99.0602                           | -0.4709                              | 7.0283                          | 0.77082              |
| 7       | -0.052647                            | -0.16325                        | 1.5738                 | 155.6327                          | -0.17074                             | 5.5708                          | 0.6354               |
| 8       | 0.36665                              | -0.019182                       | 1.7341                 | 2757.8181                         | 0.40612                              | 7.685                           | 0.57666              |
| 9       | 0.73024                              | -0.72234                        | 1.4105                 | 297.6917                          | 0.71066                              | 28.2557                         | 0.70895              |
| 10      | 0.52886                              | 4.0336                          | 1.5464                 | 62.4443                           | -0.18036                             | 17.8156                         | 0.64665              |
| 11      | 0.029521                             | 0.065628                        | 1.3718                 | 110.1761                          | -1.035                               | 5.7239                          | 0.72895              |
| 12      | 0.11078                              | 0.38817                         | 1.4325                 | 214.2261                          | 0.11504                              | 4.7742                          | 0.69806              |
| 13      | 0.18863                              | -0.056262                       | 1.5515                 | 307.6558                          | 0.041848                             | 9.6786                          | 0.64453              |
| 14      | -0.43665                             | 0.42339                         | 1.481                  | 852.4135                          | -0.5827                              | 6.1461                          | 0.6752               |
| 15      | -0.17298                             | 0.22308                         | 1.2936                 | 661.9525                          | -0.040417                            | 5.2002                          | 0.77306              |
| 16      | 0.26742                              | -0.087043                       | 1.378                  | 129.2558                          | 0.30486                              | 5.0496                          | 0.72569              |
| 17      | -0.19906                             | 0.046163                        | 1.4533                 | 337.6735                          | -0.12585                             | 6.1222                          | 0.6881               |
| 18      | -0.8936                              | 0.026557                        | 1.5803                 | 10797.1561                        | -0.66814                             | 6.0508                          | 0.63278              |
| 19      | 0.088646                             | 0.13005                         | 1.3681                 | 21.7862                           | 0.16618                              | 7.219                           | 0.73092              |
| 20      | 0.70384                              | -0.23034                        | 1.2102                 | 23.9664                           | 0.19602                              | 4.803                           | 0.82629              |
| 21      | -0.12719                             | 0.28228                         | 1.4905                 | 44.3878                           | -0.27036                             | 8.2927                          | 0.67089              |
| 22      | -0.40763                             | 0.31821                         | 1.4709                 | 133.9964                          | -0.36649                             | 4.9885                          | 0.67986              |
| 23      | 0.39183                              | -0.50134                        | 1.4619                 | 345.4702                          | 0.55877                              | 10.4134                         | 0.68404              |
| 24      | -0.86999                             | 2.3091                          | 1.5255                 | 516.5818                          | -0.98149                             | 5.1443                          | 0.65552              |
| 25      | 0.08567                              | -0.07886                        | 1.4425                 | 183.4978                          | 0.27939                              | 8.3885                          | 0.69322              |
| 26      | -0.19784                             | 0.23476                         | 1.3668                 | 106.5138                          | -0.21023                             | 6.2932                          | 0.73161              |
| 27      | -0.11285                             | 0.07206                         | 1.5247                 | 372.1742                          | -0.18339                             | 5.9537                          | 0.65587              |
| 28      | 0.010721                             | -0.15724                        | 1.4227                 | 343.9132                          | 0.40028                              | 5.8946                          | 0.70289              |
| 29      | 0.43158                              | -0.33086                        | 1.3999                 | 57.067                            | 0.42824                              | 11.6685                         | 0.71436              |
| 30      | -0.51185                             | 0.1266                          | 1.6636                 | 225.1469                          | -0.44271                             | 5.7293                          | 0.60109              |
| 31      | -0.31803                             | 0.58606                         | 1.2707                 | 138.8103                          | -0.14946                             | 7.2349                          | 0.78696              |
| 32      | 0.49086                              | -0.23865                        | 1.2595                 | 32.1919                           | 0.22991                              | 5.3975                          | 0.79396              |
| 33      | 0.35429                              | -0.40149                        | 1.2756                 | 120.4598                          | 0.54004                              | 7.2326                          | 0.78397              |
| 34      | 0.079923                             | 0.74249                         | 1.2414                 | 150.7714                          | 0.019365                             | 5.5065                          | 0.80552              |
| 35      | -0.024273                            | -0.031012                       | 1.3367                 | 618.3694                          | 0.1023                               | 5.6674                          | 0.74812              |
| 36      | -0.79757                             | 0.78669                         | 1.3577                 | 135.2074                          | -0.64348                             | 6.9652                          | 0.73656              |
| 37      | 0.12058                              | -0.11358                        | 1.4017                 | 720.5642                          | 0.40968                              | 7.7714                          | 0.71343              |
| 38      | 0.18979                              | -0.017449                       | 1.501                  | 110.148                           | 0.046634                             | 6.8366                          | 0.66623              |
| 39      | 0.02096                              | 0.68229                         | 1.4767                 | 2478.0927                         | -0.16527                             | 6.5081                          | 0.6772               |



|    |           |           |        |           |            |         |         |
|----|-----------|-----------|--------|-----------|------------|---------|---------|
| 40 | -1.2544   | 2.826     | 1.3601 | 457.8914  | -1.6927    | 4.8215  | 0.73526 |
| 41 | -0.12355  | -0.025295 | 1.3206 | 47.3304   | -0.080832  | 5.0149  | 0.75724 |
| 42 | 0.42366   | -0.10629  | 1.7773 | 22.8939   | 0.58701    | 6.6822  | 0.56265 |
| 43 | -0.2798   | -0.20219  | 1.2908 | 287.9275  | -0.16063   | 7.0929  | 0.7747  |
| 44 | -0.26526  | 0.3047    | 1.5164 | 641.9598  | -0.3302    | 5.1218  | 0.65945 |
| 45 | 0.16922   | -0.472    | 1.4456 | 781.1383  | 0.2032     | 7.945   | 0.69177 |
| 46 | -0.38332  | 0.34317   | 1.3117 | 209.0066  | -0.16245   | 5.1336  | 0.76236 |
| 47 | 0.16611   | -0.15856  | 1.3715 | 137.2385  | 0.3098     | 7.3771  | 0.72914 |
| 48 | 0.21937   | -0.29765  | 1.436  | 176.8419  | 0.27555    | 5.3119  | 0.6964  |
| 49 | 0.34916   | -0.29311  | 1.5666 | 2877.8209 | 0.23662    | 5.5241  | 0.63833 |
| 50 | -0.68937  | 0.081726  | 1.3957 | 115.4471  | -0.71562   | 5.7782  | 0.7165  |
| 51 | 0.10108   | 0.097094  | 1.4649 | 244.4665  | 0.057605   | 10.2077 | 0.68264 |
| 52 | -0.26422  | 0.58617   | 1.3219 | 1074.9068 | -0.3336    | 4.0329  | 0.75649 |
| 53 | -0.33893  | 0.41814   | 1.1974 | 553.8529  | -0.42845   | 4.3891  | 0.83515 |
| 54 | 0.40618   | -0.53107  | 1.4786 | 17.1777   | 0.22128    | 10.6561 | 0.67633 |
| 55 | -0.08154  | -0.16375  | 1.4047 | 37.5983   | -0.035076  | 7.0797  | 0.71192 |
| 56 | -0.71387  | -0.05701  | 1.5186 | 636.3929  | -0.53933   | 6.7657  | 0.65851 |
| 57 | -0.12308  | 0.17684   | 1.2979 | 428.6995  | 0.14381    | 5.5637  | 0.77049 |
| 58 | -0.4511   | 0.7869    | 1.3866 | 26.7082   | -0.44754   | 5.5686  | 0.72117 |
| 59 | 0.078625  | 0.16054   | 1.3411 | 119.4973  | 0.18884    | 7.6318  | 0.74568 |
| 60 | 0.19437   | 1.0127    | 1.2127 | 310.1155  | 0.079795   | 4.0826  | 0.82459 |
| 61 | -0.28602  | 0.33966   | 1.2193 | 545.5773  | -0.37554   | 3.8381  | 0.82017 |
| 62 | -0.07028  | 1.5457    | 1.492  | 310.0009  | -0.18401   | 5.3429  | 0.67026 |
| 63 | 0.08638   | 0.23777   | 1.2777 | 1482.3554 | 0.23856    | 5.1495  | 0.78267 |
| 64 | -0.082203 | -0.3112   | 1.3401 | 525.1709  | -0.262     | 4.3729  | 0.74619 |
| 65 | 0.061434  | 0.48201   | 1.2912 | 159.7409  | 0.050615   | 3.82    | 0.77445 |
| 66 | 1.0184    | -0.86956  | 1.4196 | 16.521    | 1.1641     | 12.7703 | 0.7044  |
| 67 | 0.50943   | -0.14028  | 1.4611 | 81.2885   | 0.46145    | 10.0371 | 0.6844  |
| 68 | -0.062933 | 0.069958  | 1.6763 | 468.0122  | -0.15908   | 7.7328  | 0.59656 |
| 69 | -0.067868 | 0.1337    | 1.3151 | 165.6199  | -0.11436   | 5.6886  | 0.76038 |
| 70 | -0.89563  | 2.7099    | 1.3692 | 188.9673  | -1.3676    | 6.3023  | 0.73033 |
| 71 | -0.11414  | -0.35655  | 1.6938 | 922.6429  | -0.0006656 | 4.377   | 0.59038 |
| 72 | 0.24498   | -0.3006   | 1.2896 | 42.0312   | 0.28701    | 5.1311  | 0.77542 |
| 73 | -0.52202  | 0.45166   | 1.3265 | 201.5486  | -0.4803    | 7.6465  | 0.75389 |
| 74 | -1.344    | 0.6508    | 1.3884 | 361.9355  | -1.8286    | 69.4464 | 0.72027 |
| 75 | -0.45668  | 0.0076797 | 1.3805 | 251.7687  | -0.40691   | 5.4483  | 0.72438 |
| 76 | -0.048424 | -0.33651  | 1.2717 | 138.6181  | 0.10056    | 6.1141  | 0.78634 |
| 77 | -0.11187  | 0.312     | 1.2306 | 542.2844  | 0.03075    | 6.9144  | 0.81264 |
| 78 | -0.18094  | -0.164    | 1.2057 | 427.4933  | -0.20538   | 3.9415  | 0.8294  |
| 79 | -0.19824  | 0.12333   | 1.2335 | 401.4238  | 0.13162    | 5.6508  | 0.81069 |
| 80 | 0.15751   | -0.10671  | 1.2847 | 81.6462   | 0.033623   | 11.3187 | 0.77838 |

|     |            |           |        |           |           |         |         |
|-----|------------|-----------|--------|-----------|-----------|---------|---------|
| 81  | 0.077447   | 0.77378   | 1.1745 | 21.0923   | 0.090357  | 6.1157  | 0.85142 |
| 82  | -0.54275   | 0.99543   | 1.2189 | 874.0648  | -0.41892  | 3.021   | 0.82038 |
| 83  | 0.22394    | -0.13361  | 1.2502 | 232.5881  | 0.28568   | 4.6748  | 0.79988 |
| 84  | -0.22787   | 0.41603   | 1.2555 | 28.0665   | -0.1375   | 5.319   | 0.7965  |
| 85  | 0.24851    | -0.39653  | 1.2825 | 450.0851  | 0.36255   | 10.9628 | 0.77974 |
| 86  | -1.0182    | 0.39237   | 1.6016 | 5737.0481 | -0.54036  | 6.9339  | 0.62437 |
| 87  | -0.13018   | -0.1668   | 1.3583 | 1287.9181 | 0.074473  | 6.4899  | 0.73622 |
| 88  | -0.32674   | 0.040472  | 1.21   | 156.5058  | -0.039474 | 5.0906  | 0.82646 |
| 89  | 0.66763    | -0.18838  | 1.1524 | 225.6066  | 0.42191   | 4.1392  | 0.86775 |
| 90  | -0.048017  | 0.75259   | 1.2052 | 114.4079  | -0.049822 | 5.0127  | 0.82971 |
| 91  | -0.95871   | 1.0441    | 1.4426 | 187.0423  | -0.95159  | 11.0008 | 0.69318 |
| 92  | -0.095613  | -0.04626  | 1.3895 | 566.3438  | -0.080484 | 4.9155  | 0.71968 |
| 93  | -0.093959  | 0.045828  | 1.2414 | 250.1733  | 0.0155    | 7.6338  | 0.80556 |
| 94  | -0.21889   | -0.058404 | 1.2653 | 716.119   | -0.17457  | 4.3766  | 0.7903  |
| 95  | 0.17654    | 0.1917    | 1.2213 | 69.8449   | 0.17572   | 5.2528  | 0.81883 |
| 96  | -0.25315   | 0.45417   | 1.499  | 65.9894   | -0.058384 | 15.3853 | 0.66711 |
| 97  | 0.00061051 | 0.51783   | 1.2351 | 25.0439   | 0.012296  | 7.3517  | 0.80968 |
| 98  | 0.003033   | -0.12126  | 1.2362 | 161.6077  | 0.20659   | 5.9214  | 0.80894 |
| 99  | 0.13514    | 0.083569  | 1.2585 | 514.4767  | 0.47655   | 6.1469  | 0.79461 |
| 100 | -0.15465   | -0.040802 | 1.3458 | 226.0653  | -0.10702  | 5.4115  | 0.74304 |
| 101 | -0.11147   | -0.32719  | 1.33   | 54.4961   | -0.090004 | 6.0987  | 0.75188 |
| 102 | -0.13052   | -0.10792  | 1.3203 | 968.932   | -0.035882 | 5.4075  | 0.75739 |
| 103 | 0.067141   | -0.099938 | 1.2758 | 43.9797   | 0.066755  | 4.4161  | 0.78385 |
| 104 | 0.041719   | -0.17166  | 1.6498 | 251.914   | 0.17371   | 7.5275  | 0.60612 |
| 105 | -0.16835   | -0.015715 | 1.7548 | 1317.8853 | -0.12918  | 7.7906  | 0.56987 |
| 106 | -0.28082   | 0.34674   | 1.4312 | 752.5936  | 0.143     | 4.7783  | 0.69871 |
| 107 | -0.077993  | 0.79769   | 1.2693 | 95.8903   | 0.065384  | 9.4025  | 0.78784 |
| 108 | -0.34712   | 0.11838   | 1.2639 | 923.4769  | -0.21134  | 5.5944  | 0.7912  |
| 109 | 0.061508   | 0.69907   | 1.185  | 211.5988  | 0.45093   | 7.5936  | 0.8439  |
| 110 | 0.1764     | -0.019276 | 1.2477 | 371.369   | -0.028347 | 6.189   | 0.80146 |
| 111 | -0.78324   | 0.47637   | 1.5137 | 499.4588  | -0.58253  | 8.9615  | 0.66064 |
| 112 | -0.28061   | 0.25703   | 1.2318 | 341.1666  | -0.43298  | 6.8023  | 0.81179 |

| Patient | Shape_compactness2_AIP | LoG_sigma_3_mm_3D_glc_m_infoCorr2_AIP | Wavelet_HLL_stats_s_kewness_AIP | Wavelet_LLL_stats_max_AIP | LoG_sigma_3_mm_3D_glc_m_correl1_AIP | Wavelet_LHH_glc_m_correl1_AIP | Wavelet_HLH_rigl_lowGrayLevelRunEmp_hasis_AIP |
|---------|------------------------|---------------------------------------|---------------------------------|---------------------------|-------------------------------------|-------------------------------|-----------------------------------------------|
| 1       | 0.32549                | 0.64039                               | -0.39901                        | -716.8853                 | 0.52468                             | 0.31126                       | 0.0091597                                     |
| 2       | 0.5347                 | 0.61052                               | -0.098426                       | 51.4881                   | 0.58744                             | 0.24129                       | 0.0041007                                     |
| 3       | 0.40267                | 0.69073                               | 0.053624                        | -434.2338                 | 0.65327                             | 0.27896                       | 0.0055794                                     |
| 4       | 0.39388                | 0.75049                               | -0.57803                        | 951.8377                  | 0.65507                             | 0.27448                       | 0.0012172                                     |
| 5       | 0.1933                 | 0.73456                               | -0.25616                        | 188.0641                  | 0.62682                             | 0.2501                        | 0.0030743                                     |
| 6       | 0.45799                | 0.63263                               | -0.17162                        | 151.8542                  | 0.6008                              | 0.30662                       | 0.0034199                                     |
| 7       | 0.25653                | 0.68589                               | 0.071696                        | 159.7135                  | 0.65187                             | 0.29133                       | 0.0050112                                     |
| 8       | 0.19176                | 0.66757                               | -0.63486                        | 1176.8007                 | 0.53713                             | 0.26614                       | 0.0036804                                     |
| 9       | 0.35633                | 0.70872                               | -0.94339                        | 214.6891                  | 0.63614                             | 0.24422                       | 0.0031774                                     |
| 10      | 0.2704                 | 0.64844                               | -0.66713                        | 1003.4632                 | 0.60613                             | 0.17944                       | 0.0028821                                     |
| 11      | 0.38734                | 0.68864                               | -1.2701                         | 62.759                    | 0.65526                             | 0.21151                       | 0.0045055                                     |
| 12      | 0.34016                | 0.62603                               | -0.17738                        | 124.7681                  | 0.60467                             | 0.21415                       | 0.005743                                      |
| 13      | 0.26775                | 0.68092                               | -0.53652                        | 230.4795                  | 0.56858                             | 0.20613                       | 0.0053265                                     |
| 14      | 0.30782                | 0.72121                               | -0.12298                        | 159.9268                  | 0.66649                             | 0.35306                       | 0.0024697                                     |
| 15      | 0.462                  | 0.68351                               | -0.048069                       | 130.6948                  | 0.61885                             | 0.23784                       | 0.0058291                                     |
| 16      | 0.38216                | 0.67097                               | -0.1284                         | 129.8138                  | 0.64911                             | 0.32824                       | 0.0035984                                     |
| 17      | 0.32581                | 0.65515                               | -0.17632                        | 130.5176                  | 0.61655                             | 0.2273                        | 0.0027998                                     |
| 18      | 0.25337                | 0.7321                                | -0.35554                        | 411.547                   | 0.63356                             | 0.29998                       | 0.0028188                                     |
| 19      | 0.39048                | 0.57246                               | 0.24398                         | 147.8912                  | 0.54975                             | 0.21608                       | 0.0081868                                     |
| 20      | 0.56415                | 0.66716                               | -0.60285                        | 140.0369                  | 0.6497                              | 0.27196                       | 0.0056143                                     |
| 21      | 0.30197                | 0.64215                               | -0.5247                         | 126.9844                  | 0.61919                             | 0.20553                       | 0.0059907                                     |
| 22      | 0.31424                | 0.58523                               | -0.36777                        | 140.1707                  | 0.53818                             | 0.25714                       | 0.0037487                                     |
| 23      | 0.32006                | 0.70728                               | -0.24612                        | 649.459                   | 0.62488                             | 0.22298                       | 0.0031789                                     |
| 24      | 0.28168                | 0.65236                               | 0.38555                         | 152.5415                  | 0.62732                             | 0.24998                       | 0.0033316                                     |
| 25      | 0.33314                | 0.68844                               | -0.45853                        | 150.465                   | 0.63516                             | 0.2834                        | 0.0031501                                     |
| 26      | 0.3916                 | 0.64546                               | 0.10793                         | 127.4363                  | 0.59989                             | 0.25319                       | 0.0039353                                     |
| 27      | 0.28214                | 0.64451                               | -0.4085                         | 164.6941                  | 0.61969                             | 0.24392                       | 0.0046847                                     |
| 28      | 0.34727                | 0.67545                               | 0.34229                         | 143.1662                  | 0.60171                             | 0.32826                       | 0.0035177                                     |
| 29      | 0.36454                | 0.70728                               | -0.78105                        | 213.9985                  | 0.66416                             | 0.26989                       | 0.0028684                                     |
| 30      | 0.21718                | 0.62585                               | 0.025625                        | 202.2539                  | 0.59431                             | 0.26135                       | 0.0051934                                     |
| 31      | 0.48737                | 0.64232                               | -0.093749                       | 159.9245                  | 0.55923                             | 0.29433                       | 0.0048353                                     |
| 32      | 0.50049                | 0.61485                               | -0.61775                        | -406.9511                 | 0.59935                             | 0.22378                       | 0.0066998                                     |
| 33      | 0.48184                | 0.68773                               | 0.25456                         | 148.8944                  | 0.65728                             | 0.29995                       | 0.0029007                                     |
| 34      | 0.52267                | 0.69169                               | -0.26088                        | -76.4537                  | 0.66425                             | 0.29604                       | 0.0042551                                     |
| 35      | 0.4187                 | 0.64417                               | -0.1347                         | 376.339                   | 0.55608                             | 0.23053                       | 0.0044251                                     |
| 36      | 0.3996                 | 0.61845                               | -0.062079                       | 151.8335                  | 0.5544                              | 0.21199                       | 0.0060896                                     |
| 37      | 0.36313                | 0.71413                               | -0.43186                        | 146.4486                  | 0.60674                             | 0.32092                       | 0.0041293                                     |
| 38      | 0.29571                | 0.67886                               | -1.4021                         | 540.2164                  | 0.64328                             | 0.24618                       | 0.0035434                                     |
| 39      | 0.31057                | 0.70363                               | -0.3721                         | 1046.9842                 | 0.65806                             | 0.27647                       | 0.001442                                      |

|    |         |         |            |           |         |         |           |
|----|---------|---------|------------|-----------|---------|---------|-----------|
| 40 | 0.39749 | 0.674   | -0.077575  | -97.5487  | 0.66314 | 0.23837 | 0.0057826 |
| 41 | 0.4342  | 0.65182 | -0.10093   | 113.7405  | 0.63689 | 0.21107 | 0.0043723 |
| 42 | 0.17812 | 0.5826  | 0.044683   | 110.7841  | 0.56689 | 0.22396 | 0.0040212 |
| 43 | 0.46494 | 0.63135 | 0.090927   | 91.6757   | 0.59859 | 0.2509  | 0.009061  |
| 44 | 0.28678 | 0.64106 | -0.62554   | 154.5605  | 0.58197 | 0.27945 | 0.0039411 |
| 45 | 0.33105 | 0.75346 | -0.20433   | 213.8476  | 0.62751 | 0.24973 | 0.0029509 |
| 46 | 0.44308 | 0.60705 | 0.17296    | 86.5835   | 0.55002 | 0.21827 | 0.0059219 |
| 47 | 0.38764 | 0.67313 | -0.2882    | 159.3977  | 0.61882 | 0.27976 | 0.0036371 |
| 48 | 0.33773 | 0.61308 | 0.17044    | 78.6317   | 0.59435 | 0.24704 | 0.0055401 |
| 49 | 0.2601  | 0.69448 | -0.38185   | 223.9231  | 0.64877 | 0.27151 | 0.0025684 |
| 50 | 0.36783 | 0.59016 | 0.047239   | 163.9244  | 0.57285 | 0.2115  | 0.005449  |
| 51 | 0.3181  | 0.68505 | -0.69265   | 274.0241  | 0.629   | 0.2732  | 0.0025462 |
| 52 | 0.43292 | 0.67293 | -0.18186   | -18.5046  | 0.56894 | 0.27893 | 0.0043674 |
| 53 | 0.5825  | 0.67247 | 0.61147    | 149.694   | 0.52817 | 0.18518 | 0.0056731 |
| 54 | 0.30937 | 0.6276  | -0.36972   | 204.3488  | 0.61652 | 0.16579 | 0.0039766 |
| 55 | 0.36082 | 0.67749 | 0.24671    | 60.0253   | 0.63816 | 0.23878 | 0.004331  |
| 56 | 0.28555 | 0.68979 | 0.10596    | 241.8853  | 0.66045 | 0.28022 | 0.0030412 |
| 57 | 0.4574  | 0.7921  | 0.36271    | 218.5182  | 0.6843  | 0.30785 | 0.0055785 |
| 58 | 0.37507 | 0.58132 | 0.23066    | 131.9748  | 0.57108 | 0.21124 | 0.0046072 |
| 59 | 0.41463 | 0.66076 | -0.0062164 | 192.5715  | 0.61333 | 0.24936 | 0.0032773 |
| 60 | 0.56069 | 0.68681 | 0.41728    | 132.8399  | 0.64689 | 0.27823 | 0.0031086 |
| 61 | 0.55171 | 0.7037  | 0.12732    | 53.375    | 0.55567 | 0.32236 | 0.015033  |
| 62 | 0.30111 | 0.60583 | -0.19592   | -17.5214  | 0.59431 | 0.21493 | 0.0030806 |
| 63 | 0.47945 | 0.65637 | 0.28476    | 132.5173  | 0.49601 | 0.29741 | 0.0061803 |
| 64 | 0.41548 | 0.7284  | 0.021      | 196.7053  | 0.67973 | 0.36635 | 0.0065707 |
| 65 | 0.46449 | 0.64718 | -0.067326  | 33.2827   | 0.61207 | 0.24714 | 0.0055626 |
| 66 | 0.34951 | 0.60907 | -1.2985    | 157.2674  | 0.60512 | 0.17818 | 0.011922  |
| 67 | 0.32058 | 0.72729 | -0.46452   | 181.3909  | 0.68192 | 0.27385 | 0.003273  |
| 68 | 0.21231 | 0.61291 | -0.033839  | 158.6916  | 0.5703  | 0.21129 | 0.0040108 |
| 69 | 0.43964 | 0.62683 | -0.081335  | 70.4818   | 0.58128 | 0.28383 | 0.0056899 |
| 70 | 0.38954 | 0.66544 | 0.072377   | 250.8889  | 0.65816 | 0.21512 | 0.0028924 |
| 71 | 0.20578 | 0.65551 | -0.28696   | 249.9265  | 0.54699 | 0.30885 | 0.0062683 |
| 72 | 0.46625 | 0.62028 | -0.40084   | -219.6804 | 0.60677 | 0.25876 | 0.0046986 |
| 73 | 0.42847 | 0.67855 | 0.10026    | 219.905   | 0.62961 | 0.27038 | 0.003761  |
| 74 | 0.37367 | 0.70068 | -0.22092   | 464.2734  | 0.69075 | 0.22598 | 0.0018045 |
| 75 | 0.3801  | 0.62672 | -0.017451  | 149.6935  | 0.59699 | 0.20499 | 0.0028889 |
| 76 | 0.48621 | 0.64879 | -0.24513   | 224.2238  | 0.60876 | 0.23066 | 0.005718  |
| 77 | 0.53665 | 0.62852 | -0.20999   | 156.1936  | 0.4613  | 0.29548 | 0.0068394 |
| 78 | 0.57054 | 0.68937 | 0.099734   | 131.3334  | 0.60614 | 0.22433 | 0.0087718 |
| 79 | 0.53281 | 0.6468  | 0.38138    | 152.0611  | 0.58792 | 0.30962 | 0.0042015 |
| 80 | 0.4716  | 0.72159 | -0.24775   | 245.856   | 0.68676 | 0.24886 | 0.0045719 |

|     |         |         |           |           |         |         |           |
|-----|---------|---------|-----------|-----------|---------|---------|-----------|
| 81  | 0.61722 | 0.57294 | -0.39661  | 158.3339  | 0.54259 | 0.2345  | 0.012543  |
| 82  | 0.55213 | 0.71295 | 0.36588   | 285.3506  | 0.47513 | 0.24819 | 0.0042013 |
| 83  | 0.51176 | 0.67961 | -0.063232 | 50.7258   | 0.61763 | 0.26789 | 0.006145  |
| 84  | 0.50531 | 0.57077 | 0.36214   | 152.2802  | 0.53084 | 0.20476 | 0.010263  |
| 85  | 0.47408 | 0.7458  | -0.29246  | 189.416   | 0.67036 | 0.33355 | 0.0044674 |
| 86  | 0.24341 | 0.71691 | 0.18237   | 392.5526  | 0.64008 | 0.26428 | 0.0012727 |
| 87  | 0.39905 | 0.66553 | 0.21843   | 135.985   | 0.56892 | 0.27567 | 0.0041248 |
| 88  | 0.56451 | 0.62524 | 0.46069   | 10.1431   | 0.57766 | 0.28973 | 0.0062372 |
| 89  | 0.65342 | 0.77344 | -0.98668  | -144.11   | 0.59895 | 0.27942 | 0.016075  |
| 90  | 0.57119 | 0.68149 | -0.19019  | 78.7716   | 0.6289  | 0.31489 | 0.014737  |
| 91  | 0.33307 | 0.59071 | 0.10952   | 723.8474  | 0.55756 | 0.23525 | 0.0035142 |
| 92  | 0.37275 | 0.64374 | 0.42264   | 136.0577  | 0.60084 | 0.31758 | 0.0035542 |
| 93  | 0.52274 | 0.61791 | -0.15615  | 170.5241  | 0.57264 | 0.26224 | 0.0041046 |
| 94  | 0.4936  | 0.62736 | -0.43789  | -130.9008 | 0.54154 | 0.29596 | 0.010343  |
| 95  | 0.54901 | 0.64151 | -0.069381 | 111.3562  | 0.62091 | 0.21621 | 0.0045712 |
| 96  | 0.29689 | 0.59101 | -0.29956  | 427.4618  | 0.54924 | 0.2401  | 0.0024809 |
| 97  | 0.53081 | 0.63875 | 0.47833   | 133.5248  | 0.62784 | 0.18613 | 0.0073544 |
| 98  | 0.52935 | 0.63024 | 0.50317   | 108.4008  | 0.58412 | 0.29418 | 0.0058849 |
| 99  | 0.50172 | 0.70086 | -0.054408 | 270.6781  | 0.58514 | 0.27907 | 0.0048516 |
| 100 | 0.41024 | 0.63089 | -0.33729  | 189.5471  | 0.50845 | 0.29269 | 0.0052238 |
| 101 | 0.42506 | 0.64841 | 0.25767   | 96.0867   | 0.63082 | 0.25415 | 0.0050032 |
| 102 | 0.43448 | 0.64705 | -0.19908  | 191.9445  | 0.55662 | 0.2532  | 0.0037413 |
| 103 | 0.48161 | 0.6514  | 0.07329   | 181.874   | 0.62904 | 0.20142 | 0.0050399 |
| 104 | 0.22268 | 0.68866 | -0.17084  | 196.2886  | 0.63115 | 0.2971  | 0.0041524 |
| 105 | 0.18506 | 0.64556 | -0.19042  | 264.7257  | 0.62356 | 0.26031 | 0.0024121 |
| 106 | 0.34111 | 0.66286 | -0.076798 | 203.0279  | 0.58327 | 0.29752 | 0.0048768 |
| 107 | 0.489   | 0.63087 | 0.62271   | 163.14    | 0.60162 | 0.2634  | 0.0048432 |
| 108 | 0.4953  | 0.67346 | -0.35145  | 166.9744  | 0.52395 | 0.19341 | 0.0062597 |
| 109 | 0.60099 | 0.67877 | 0.67138   | 197.6163  | 0.58857 | 0.32086 | 0.0045459 |
| 110 | 0.5148  | 0.64049 | -0.51329  | -561.4378 | 0.56373 | 0.24984 | 0.01088   |
| 111 | 0.28833 | 0.63317 | 0.49212   | 262.4335  | 0.54177 | 0.2454  | 0.0036398 |
| 112 | 0.53497 | 0.6207  | 0.13217   | 198.8119  | 0.51248 | 0.25475 | 0.0048612 |
