# Supplementary material for: Associations of Radiomic Data Extracted from Static and Respiratory-Gated CT Scans with Disease Recurrence in Lung Cancer Patients Treated with SBRT
Source: PubMed Central journal article supplement (PMC5207741; doi:10.1371/journal.pone.0169172), 2017-01-03
Supplement: pone.0169172.s008.pdf [file pone.0169172.s008.pdf]

**S1 Table.** Description of selected radiomic features

| <b>Feature</b>                           | <b>Group</b> | <b>Description</b>                                                                |
|------------------------------------------|--------------|-----------------------------------------------------------------------------------|
| Sphericity                               | Shape        | How close the tumor is to a sphere with similar volume                            |
| Sphere disproportionality                | Shape        | How far the tumor is to a sphere with similar volume                              |
| Compactness                              | Shape        | How compact the tumor is (low area/volume ratio)                                  |
| Max                                      | Statistics   | Max voxel intensity value                                                         |
| Min                                      | Statistics   | Min voxel intensity value                                                         |
| Mean                                     | Statistics   | Mean voxel intensity value                                                        |
| Range                                    | Statistics   | The range of voxels intensity values                                              |
| Skewness                                 | Statistics   | Describe the shape of a probability distribution of the voxel intensity histogram |
| Total energy                             | Statistics   | Describe the energy of the image                                                  |
| Variance                                 | Statistics   | Variance of the voxel intensity histogram                                         |
| Kurtosis                                 | Statistics   | Describe the shape of a probability distribution of the voxel intensity histogram |
| GLCM homogeneity                         | Texture      | Sensitive to similar patterns of voxels across the whole tumor                    |
| GLCM correl                              | Texture      | Correlation of the GLCM matrix                                                    |
| GLCM infoCorr                            | Texture      | Generalization of the classical correlation coefficient of a normal distribution  |
| GLCM clusProm                            | Texture      | Sensitive to flat zones (areas of connecting voxels with the same value)          |
| GLSZM high intensity large area emphasis | Texture      | Sensitive to flat zones with high intensity voxels                                |
| GLCM clusShade                           | Texture      | Sensitive to flat zones                                                           |
| RLGL low gray level run emphasis         | Texture      | Sensitive to low intensity heterogeneity                                          |
| GLSZM large area emphasis                | Texture      | Sensitive to large flat zones                                                     |

\*Some of these features have Wavelet and Laplacian of Gaussian filters applied which enhance the fine and coarse textures of the tumor
