# Supplementary material for: Associations of Radiomic Data Extracted from Static and Respiratory-Gated CT Scans with Disease Recurrence in Lung Cancer Patients Treated with SBRT
Source: PubMed Central journal article supplement (PMC5207741; doi:10.1371/journal.pone.0169172), 2017-01-03
Supplement: pone.0169172.s009.pdf [file pone.0169172.s009.pdf]

**S2 Table.** Spearman's correlation coefficient of strongly correlated FB and AIP imaging features

| FB feature                             | FB feature group | AIP feature                      | AIP feature group | $\rho$ |
|----------------------------------------|------------------|----------------------------------|-------------------|--------|
| LoG 3mm 3D GLCM homogeneity1           | Texture          | LoG 3mm 3D GLCM homogeneity1     | Texture           | 0.87   |
| Wv HLH GLSZM highIntensityLargeAreaEmp | Texture          | Wv LHH GLSZM large area emphasis | Texture           | 0.92   |
| Volume                                 | Shape            | Wv LHH GLSZM large area emphasis | Texture           | 0.82   |
| Sphere disproportionality              | Shape            | Sphere disproportionality        | Shape             | 0.86   |
| Sphericity                             | Shape            | Sphericity                       | Shape             | 0.85   |
| Sphericity                             | Shape            | Compactness2                     | Shape             | 0.84   |
| Max. diameter                          | Shape            | Max. diameter                    | Shape             | 0.97   |
| Max. diameter                          | Shape            | Volume                           | Shape             | 0.81   |
| Volume                                 | Shape            | Volume                           | Shape             | 0.97   |
| Sphericity                             | Shape            | Sphere disproportionality        | Shape             | -0.86  |
| Sphere disproportionality              | Shape            | Sphericity                       | Shape             | -0.84  |
| Sphere disproportionality              | Shape            | Compactness2                     | Shape             | -0.82  |

Labels: Wv = wavelet; LoG = Laplacian of Gaussian; L = low; H = high; GLCM = Gray-Level Co-occurrence Matrix; GLSZM = Gray-Level Size Zone Matrix; RLGL = Run Low Gray Level;  $\rho$  = Spearman's correlation coefficient
