# Supplementary material for: Associations of Radiomic Data Extracted from Static and Respiratory-Gated CT Scans with Disease Recurrence in Lung Cancer Patients Treated with SBRT
Source: PubMed Central journal article supplement (PMC5207741; doi:10.1371/journal.pone.0169172), 2017-01-03
Supplement: pone.0169172.s010.pdf [file pone.0169172.s010.pdf]

**S3 Table.** Concordance indices of significant AIP imaging features

|                                       | <b>Imaging feature</b>                  | <b>Feature Group</b> | <b>C-index</b> | <b>p-value*</b>    |
|---------------------------------------|-----------------------------------------|----------------------|----------------|--------------------|
| <b><i>Distant metastasis (DM)</i></b> | Max. diameter                           | Conventional         | 0.658          | 0.015              |
|                                       | Volume                                  | Conventional         | 0.643          | 0.022              |
|                                       | Wv HLH RLGL low gray level run emphasis | Texture              | 0.676          | 0.008 <sub>8</sub> |
|                                       | GLCM corre1                             | Texture              | 0.649          | 0.014              |
|                                       | Sphericity                              | Shape                | 0.648          | 0.008 <sub>8</sub> |
|                                       | Sphere disproportionality               | Shape                | 0.648          | 0.008 <sub>8</sub> |
|                                       | Sphere compactness2                     | Shape                | 0.648          | 0.008 <sub>8</sub> |
|                                       | LoG 3mm 3D GLCM corre1                  | Texture              | 0.648          | 0.015              |
|                                       | Wv HLL skewness                         | Statistics           | 0.638          | 0.031              |

Labels: Wv = wavelet; LoG = Laplacian of Gaussian; L = low; H = high; GLCM = Gray-Level Co-occurrence Matrix; RLGL = Run Low Gray Level; stats = statistics; C-index = concordance index; \*p-values were false discovery rate corrected
